# Supplementary material for: Exploring the chemical reactivity of 2,6-dimethylchromone toward heterocyclic hydrazines and enamines: experimental and theoretical investigations
Source: Royal Society of Chemistry journal article supplement (doi:10.1039/d5ra08430j), 2026-03-30
Supplement: d5ra08430j1.pdf [file d5ra08430j1.pdf]

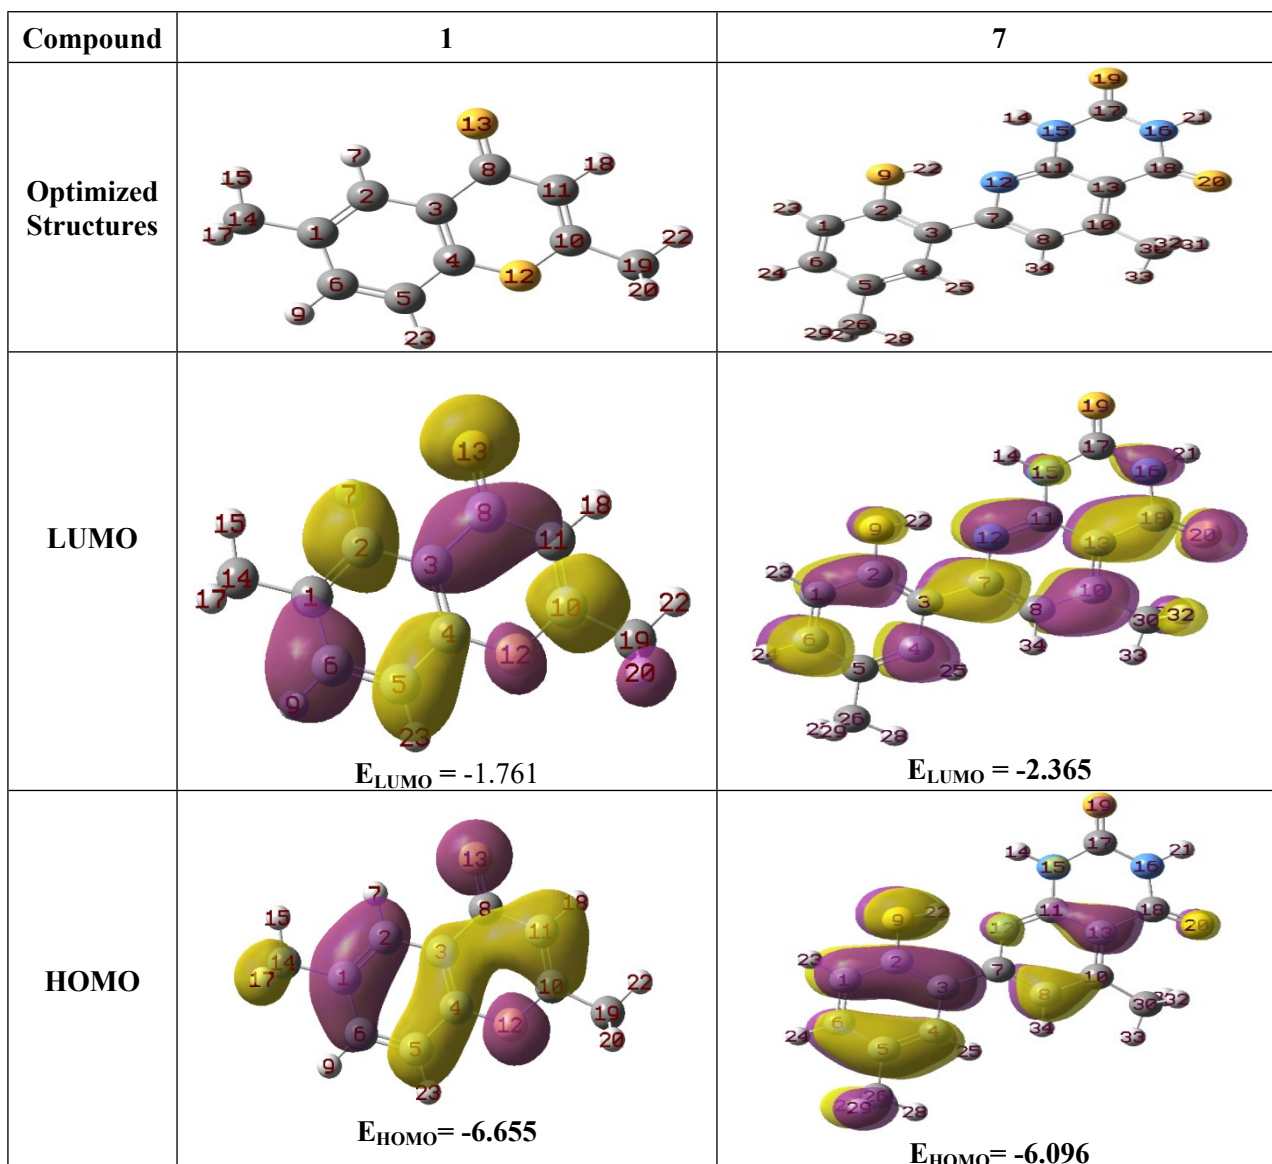

Fig. S1. Molecular modeling and the electron density of HOMO and LUMO of compounds 1 and 7

| Compound             | 8                                                                                                                                                       | 9                                                                                                                                                          |
|----------------------|---------------------------------------------------------------------------------------------------------------------------------------------------------|------------------------------------------------------------------------------------------------------------------------------------------------------------|
| Optimized Structures | 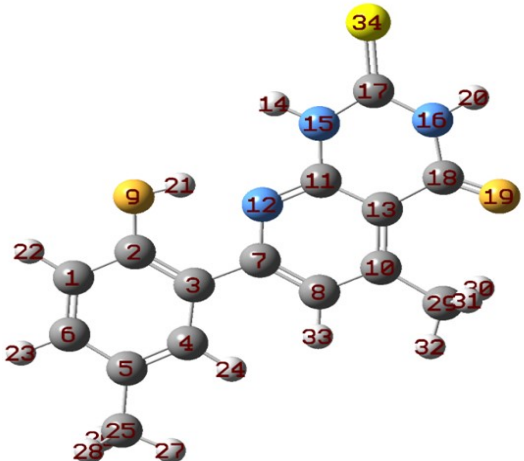                                                                       |                                                                          |
| LUMO                 |  <p data-bbox="478 1164 686 1198"><math>E_{LUMO} = -2.535</math></p>  |  <p data-bbox="1085 1164 1292 1198"><math>E_{LUMO} = -2.229</math></p>  |
| HOMO                 |  <p data-bbox="478 1702 686 1736"><math>E_{HOMO} = -6.192</math></p> |  <p data-bbox="1085 1702 1292 1736"><math>E_{HOMO} = -5.998</math></p> |

Fig. S2. Molecular modeling and the electron density of HOMO and LUMO of compounds 8 and 9

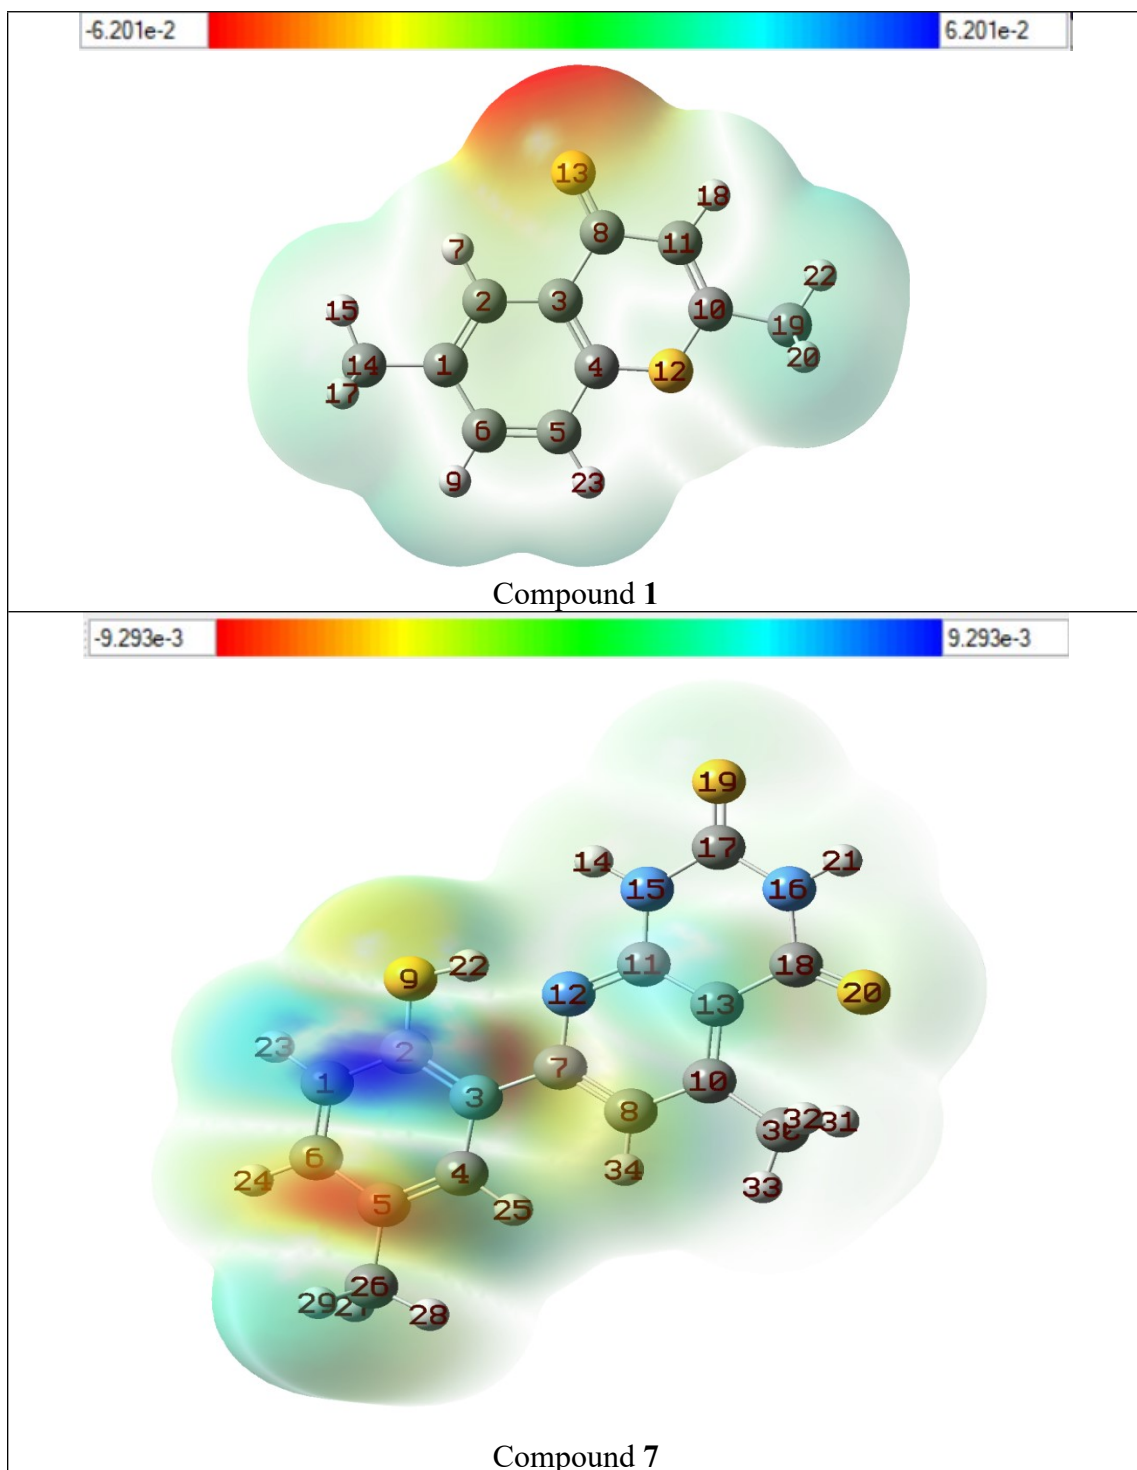

Fig. S3. Molecular electrostatic potential of compounds 1 and 7

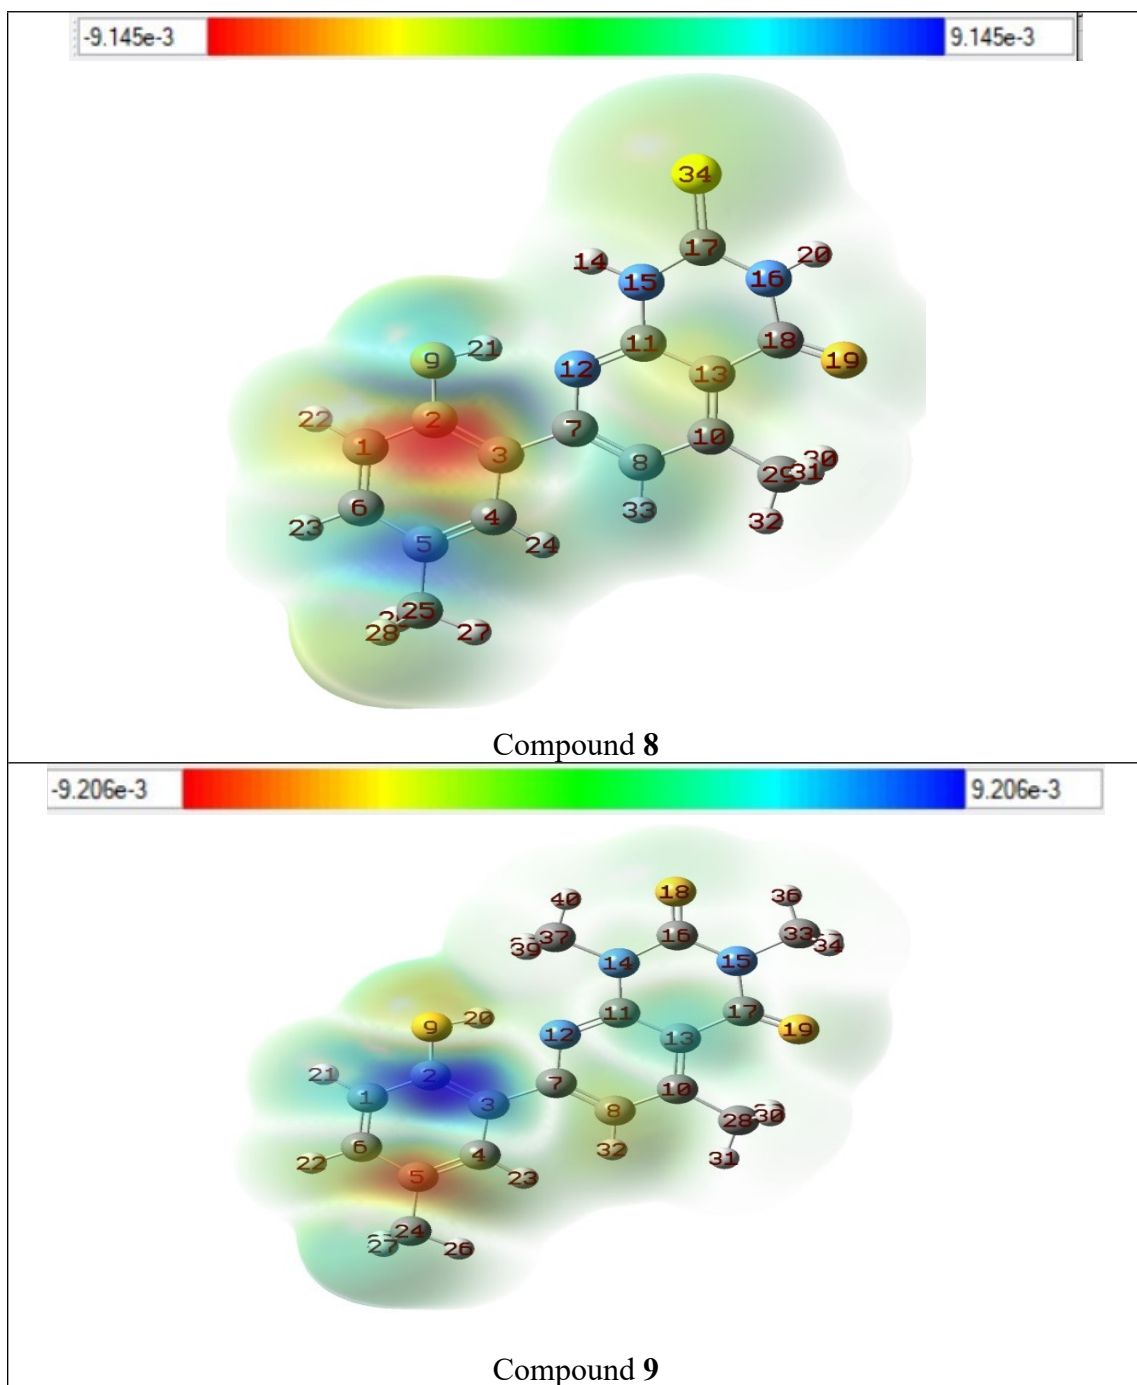

Fig. S4. Molecular electrostatic potential of compounds 8 and 9

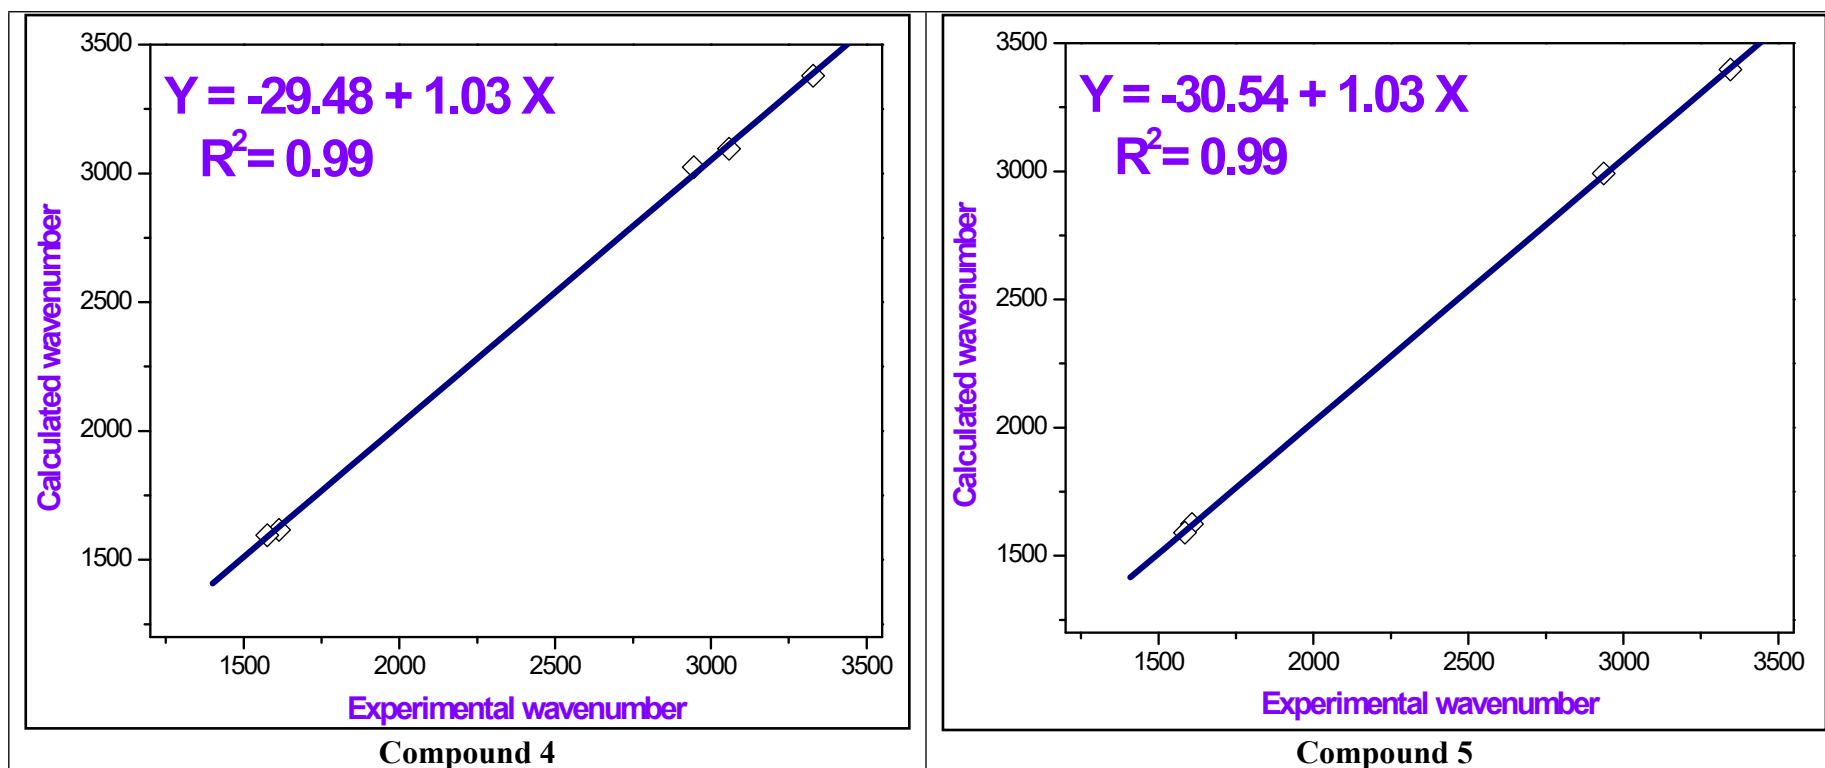

Fig. S5. The correlation relationships of the experimental *versus* calculated IR wavenumbers of compounds 4 and 5.

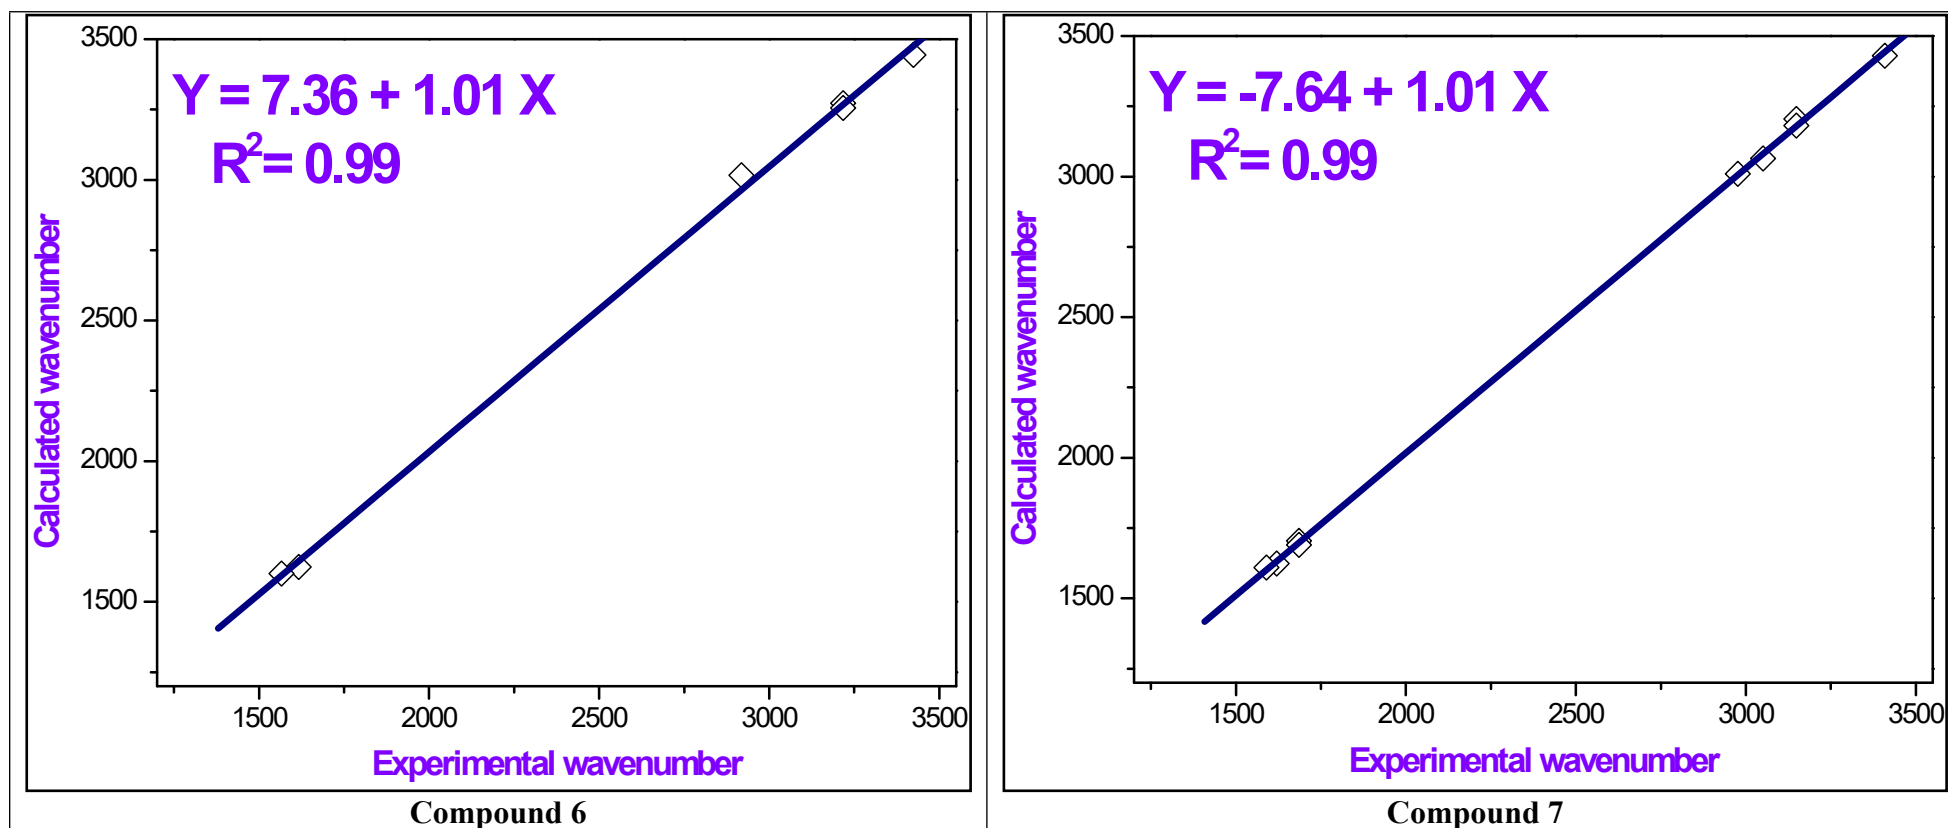

Fig. S6. The correlation relationships of the experimental *versus* calculated IR wavenumbers of compounds **6** and **7**.

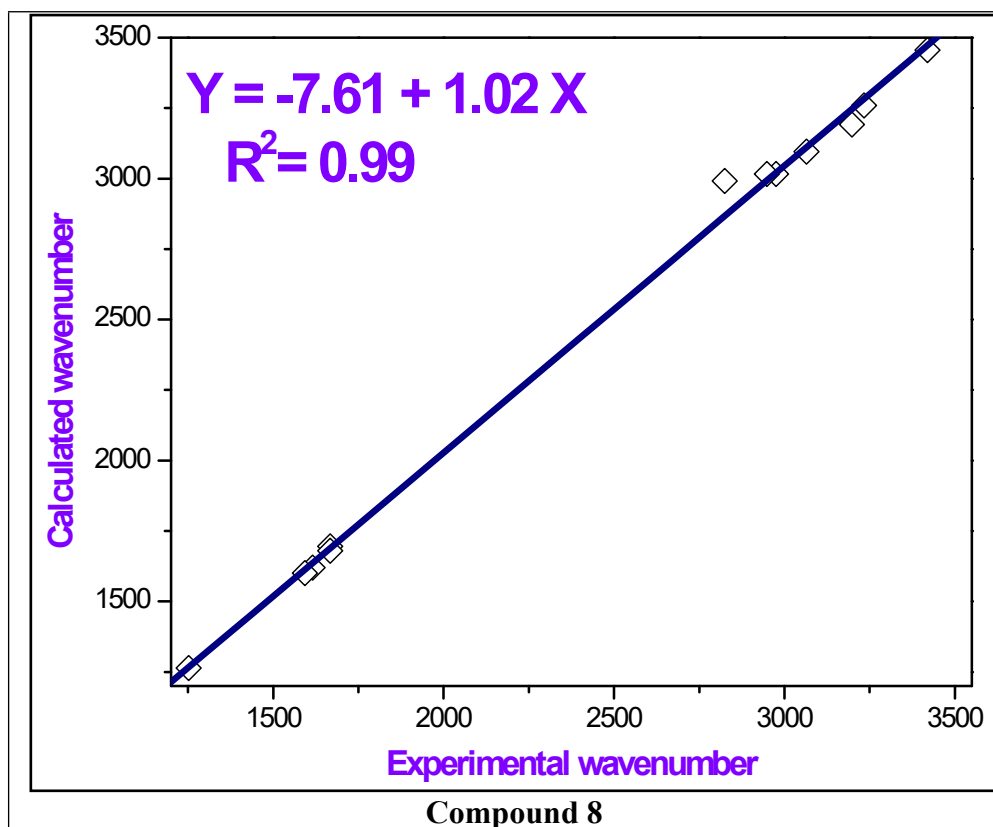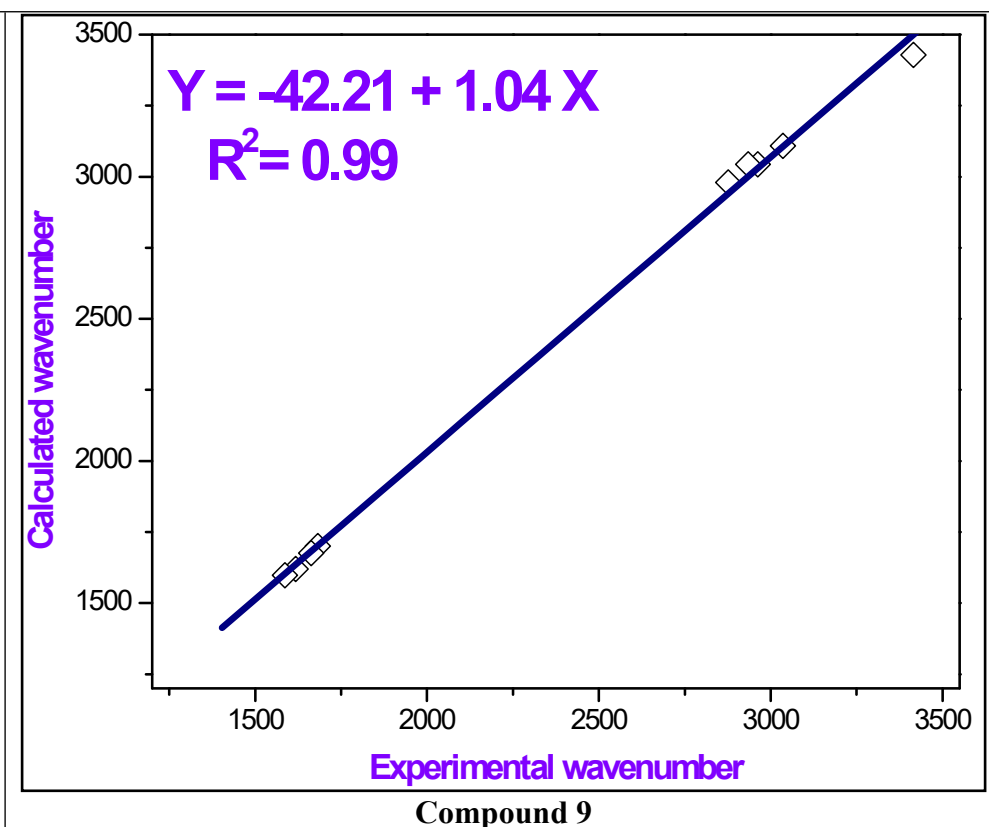

Fig. S7. The correlation relationships of the experimental *versus* calculated IR wavenumbers of compounds **8** and **9**.

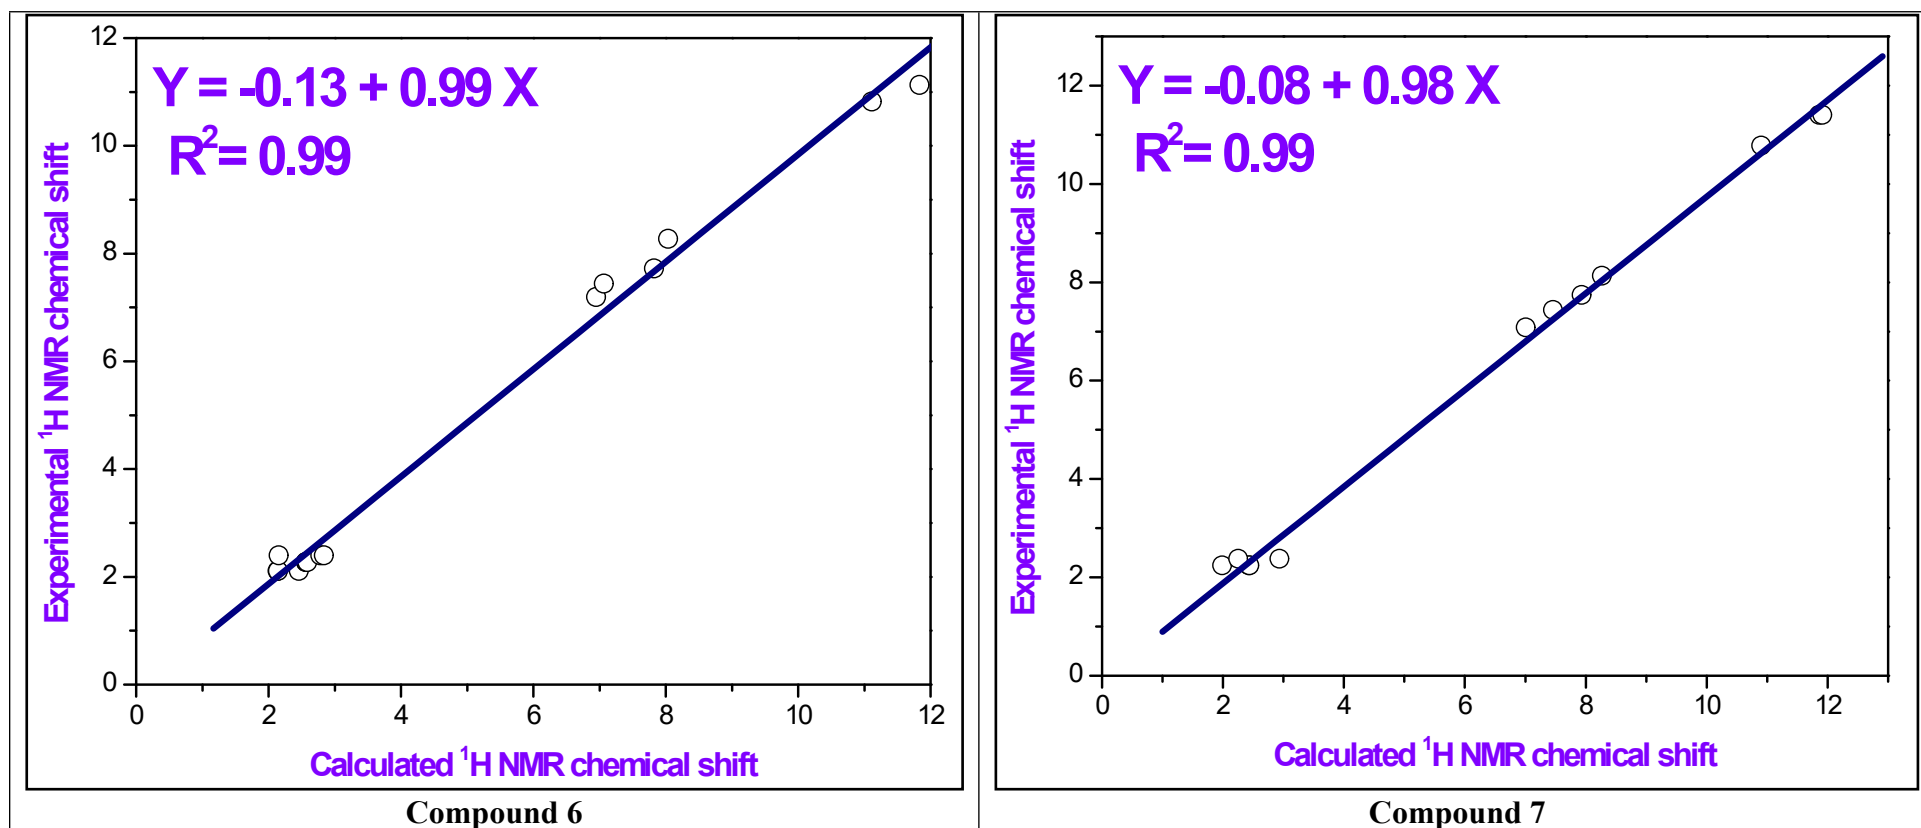

Fig. S8. The correlation relationships of the experimental *versus* calculated <sup>1</sup>H NMR chemical shifts of compounds **6** and **7**.

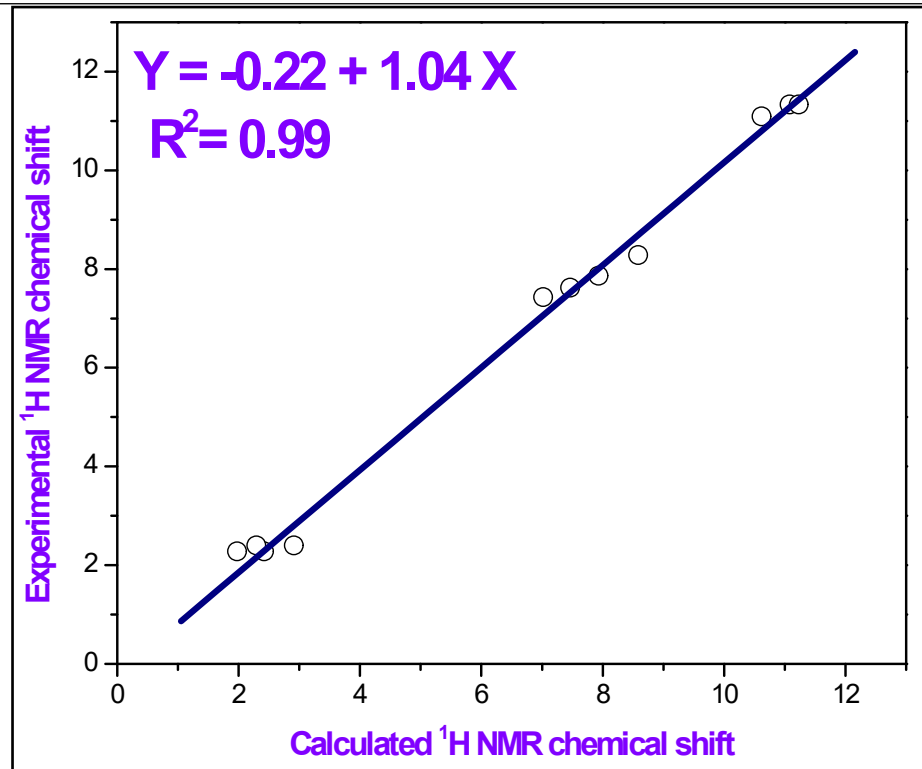

**Compound 8**

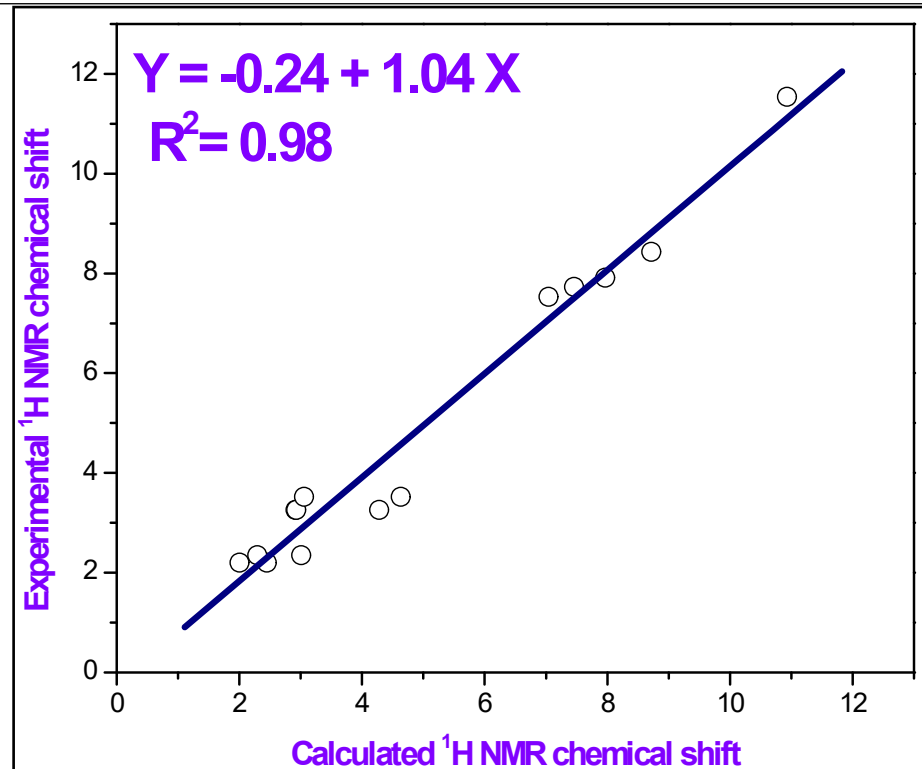

**Compound 9**

Fig. S9. The correlation relationships of the experimental *versus* calculated <sup>1</sup>H NMR chemical shifts of compounds **8** and **9**.

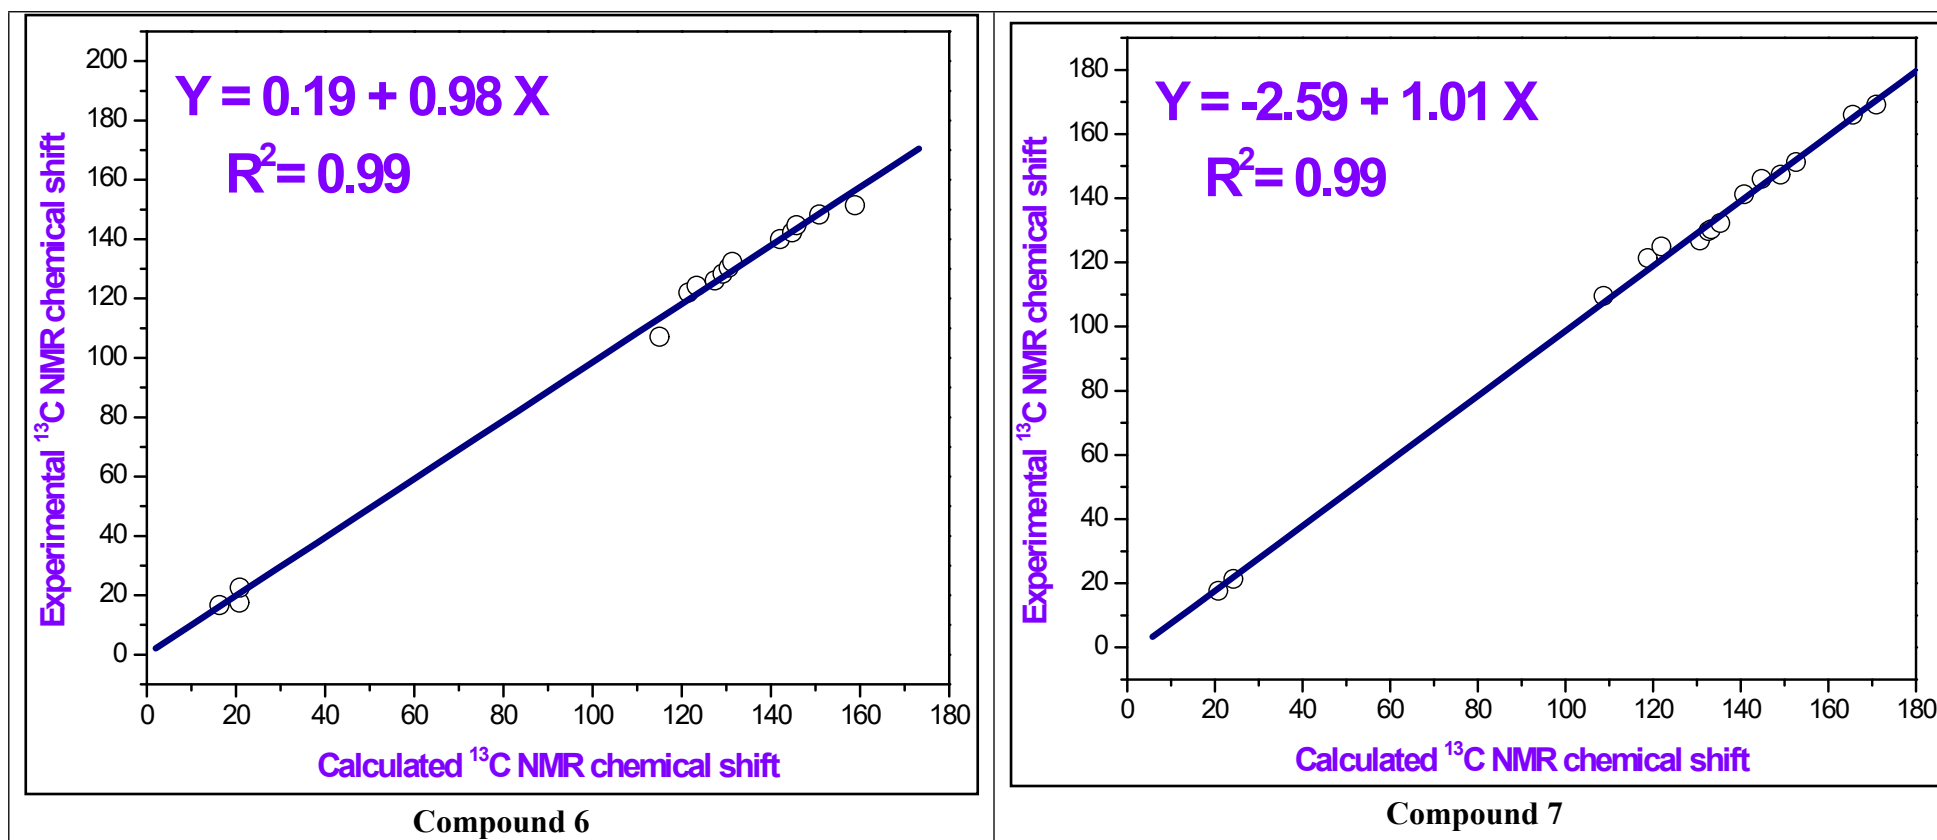

Fig. S10. The correlation relationships of the experimental *versus* calculated <sup>13</sup>C NMR chemical shifts of compounds **6** and **7**.

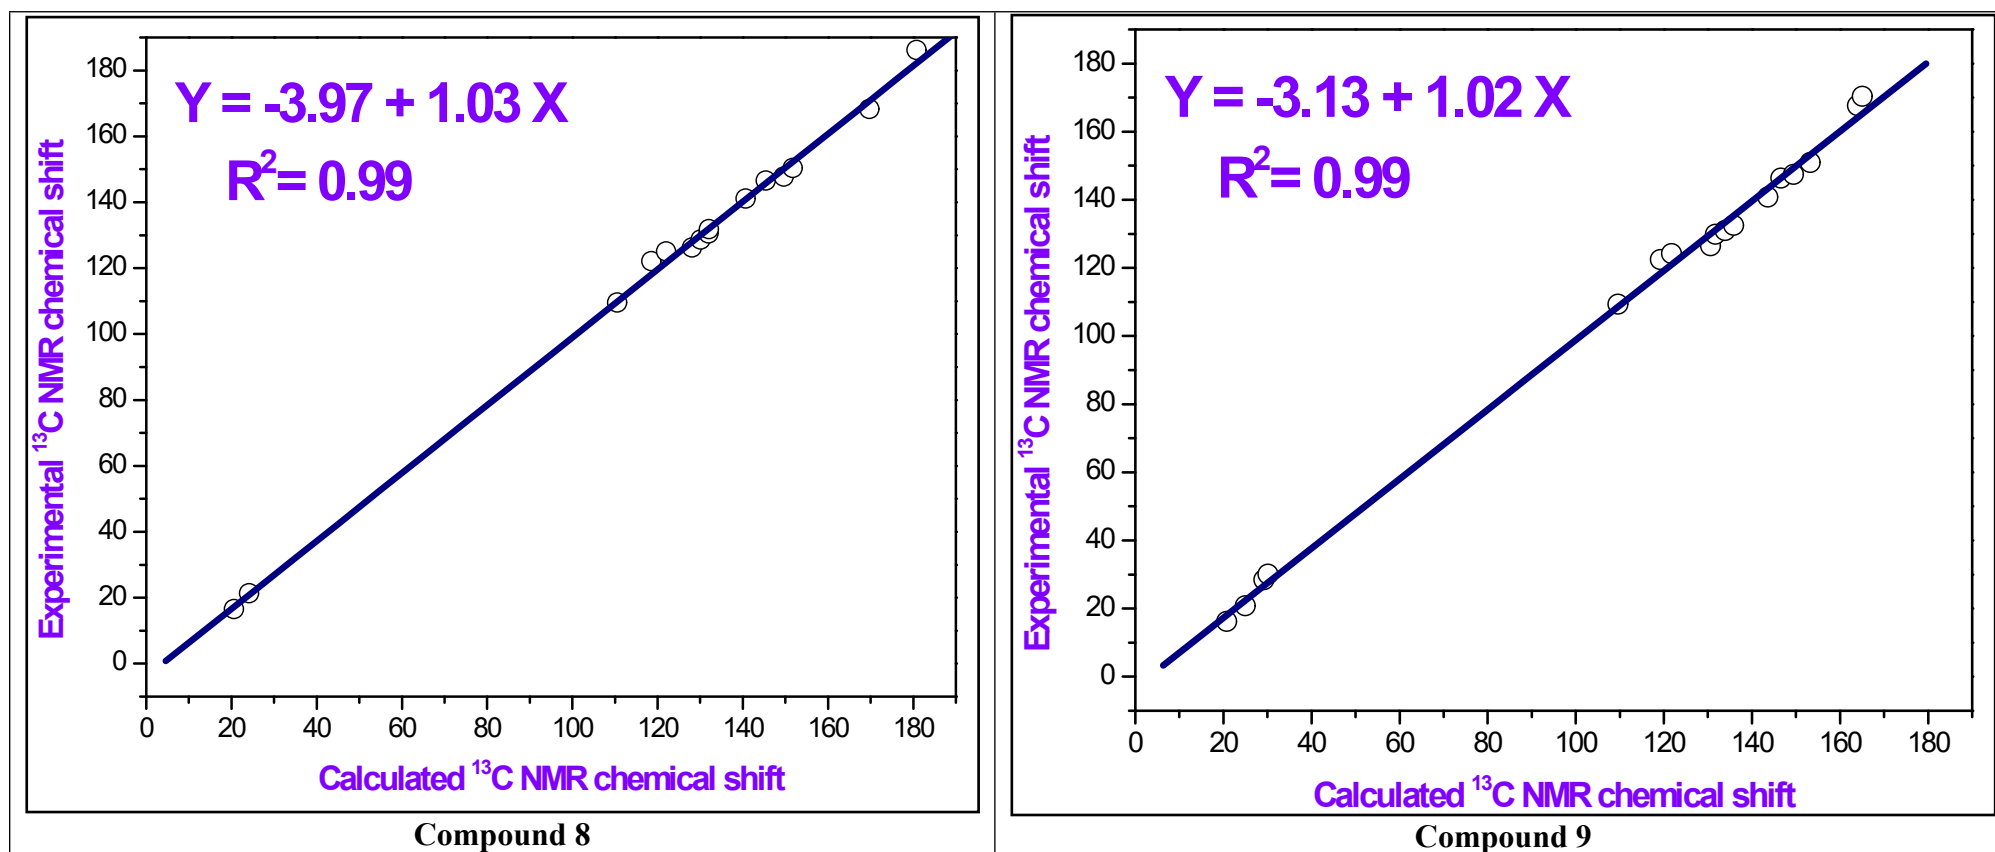

Fig. S11. The correlation relationships of the experimental *versus* calculated <sup>13</sup>C NMR chemical shifts of compounds **8** and **9**.

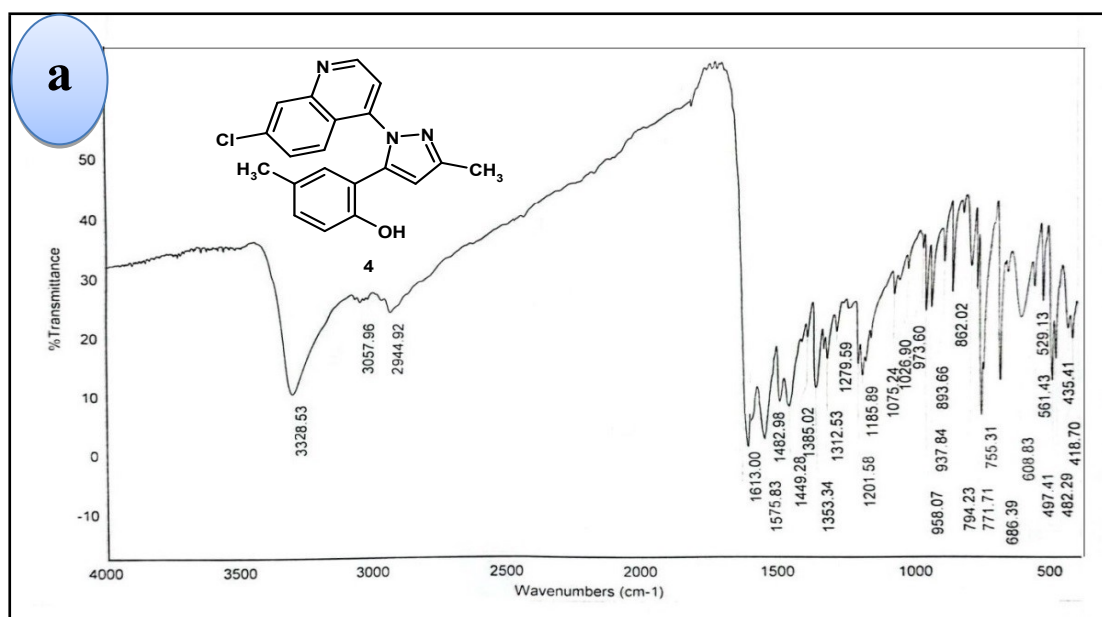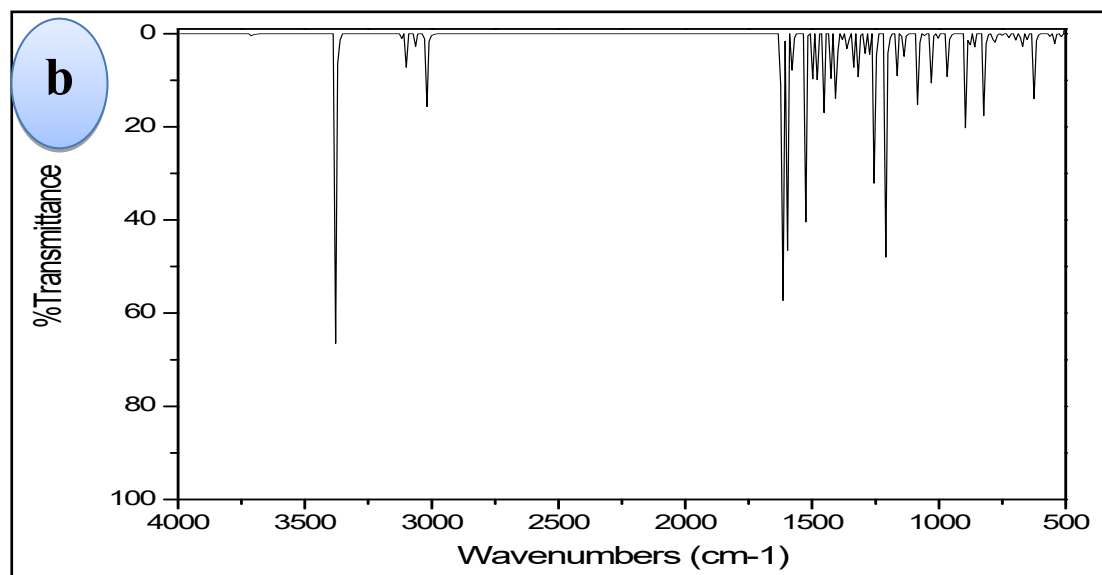

Fig. S12. (a) Experimental and (b) Calculated IR spectra of compound **4** at B3LYP/6-311++G(d,p).

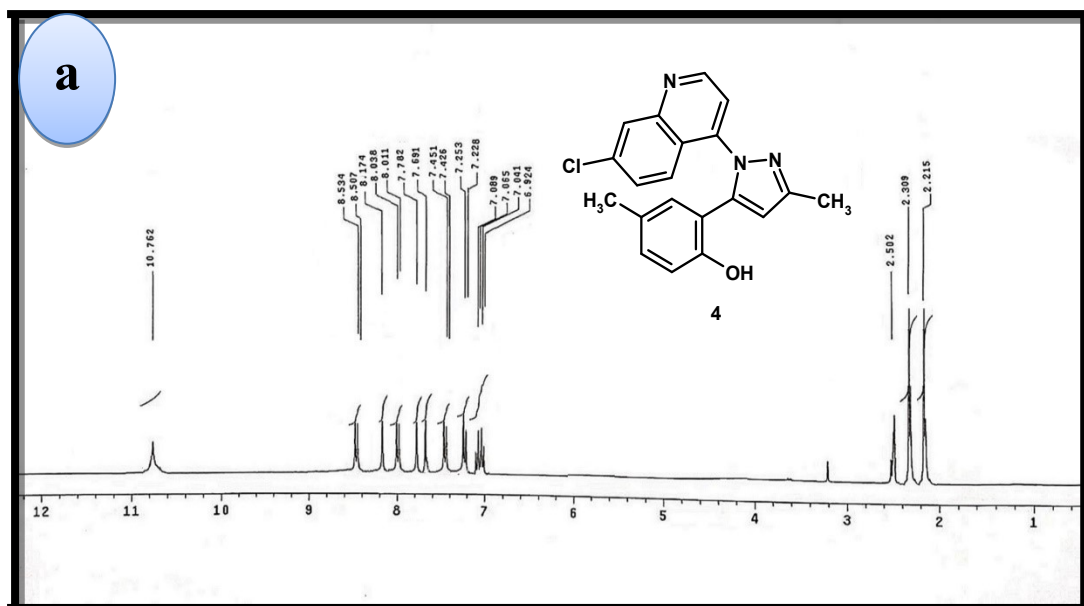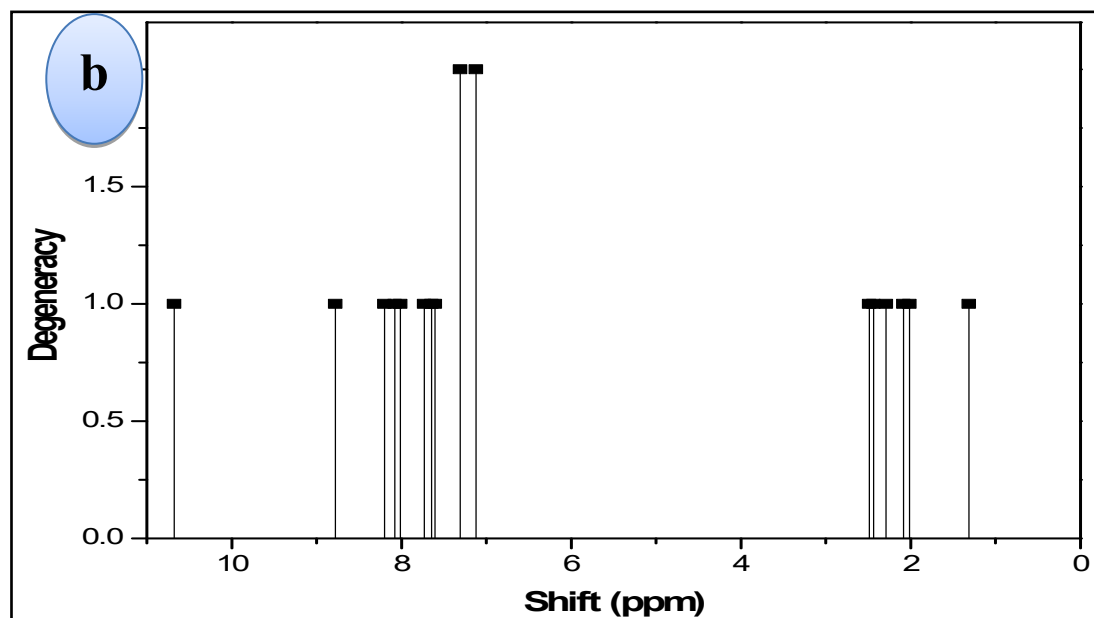

Fig. S13. (a) Experimental and (b) Calculated  $^1\text{H}$  NMR spectra of compound 4 at B3LYP/6-311++G(d,p).

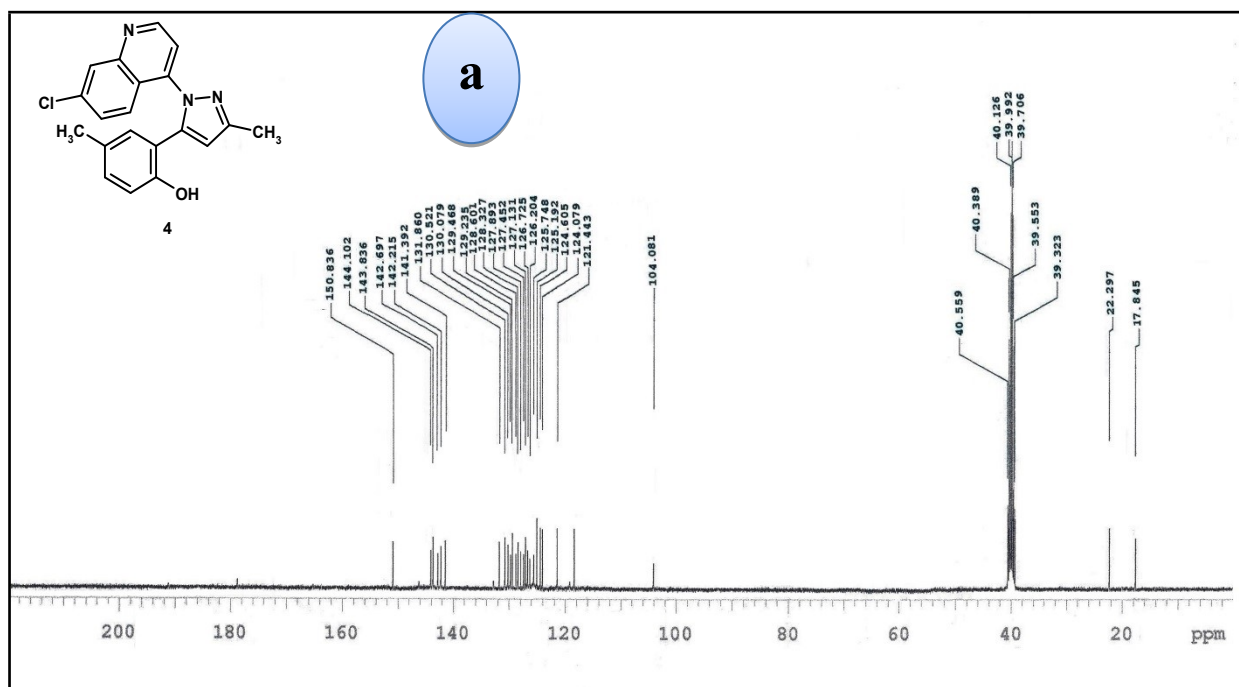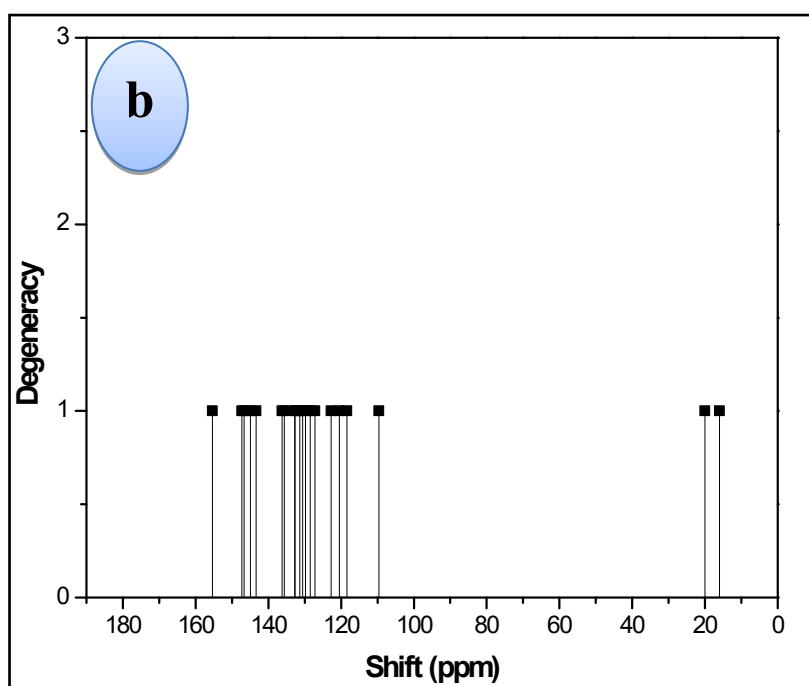

Fig. S14. (a) Experimental and (b) Calculated  $^{13}\text{C}$  NMR spectra of compound **4** at B3LYP/6-311++G(d,p).

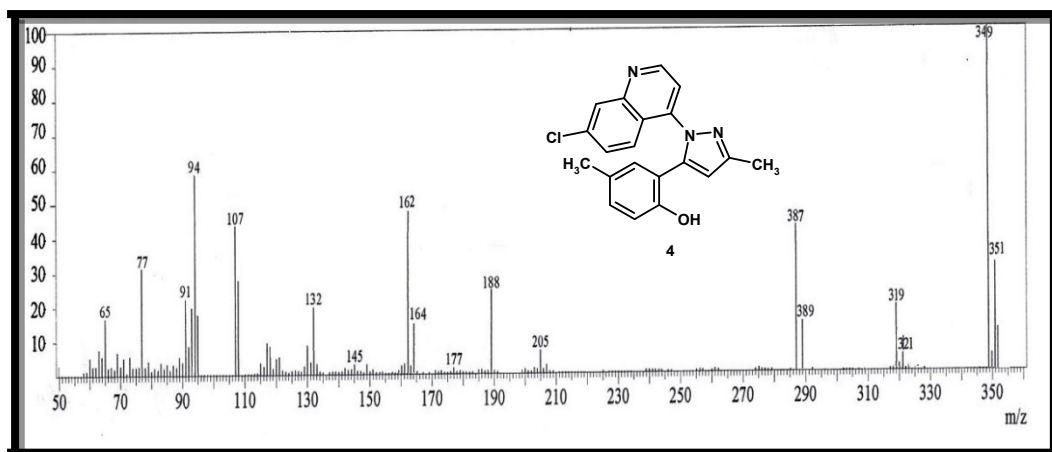

Fig. S15. Mass spectrum of compound 4

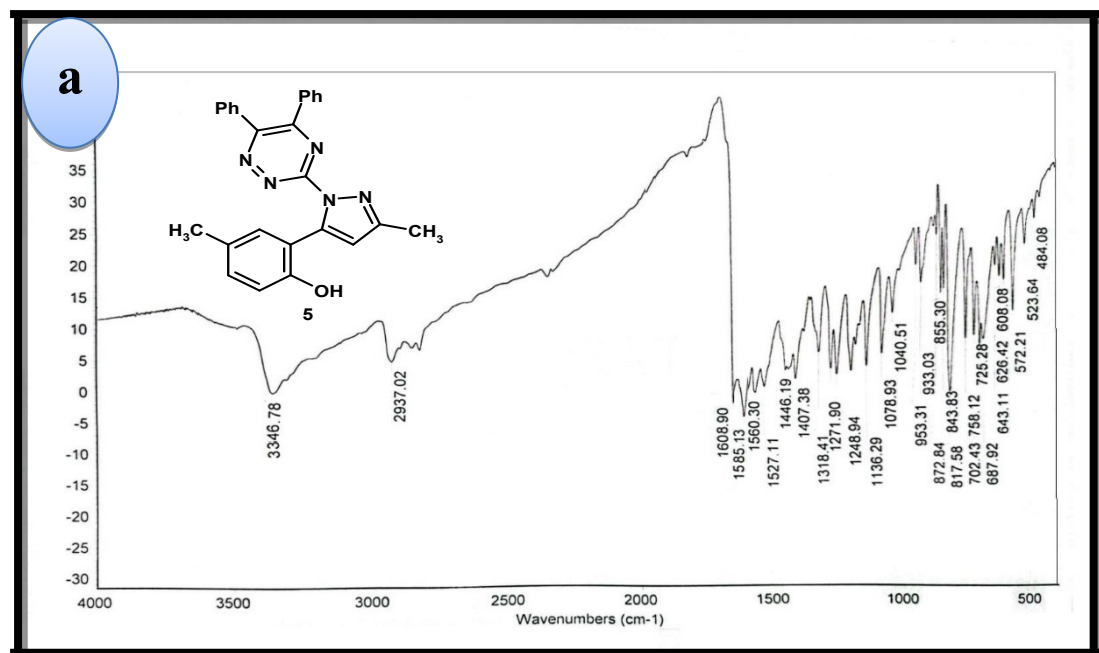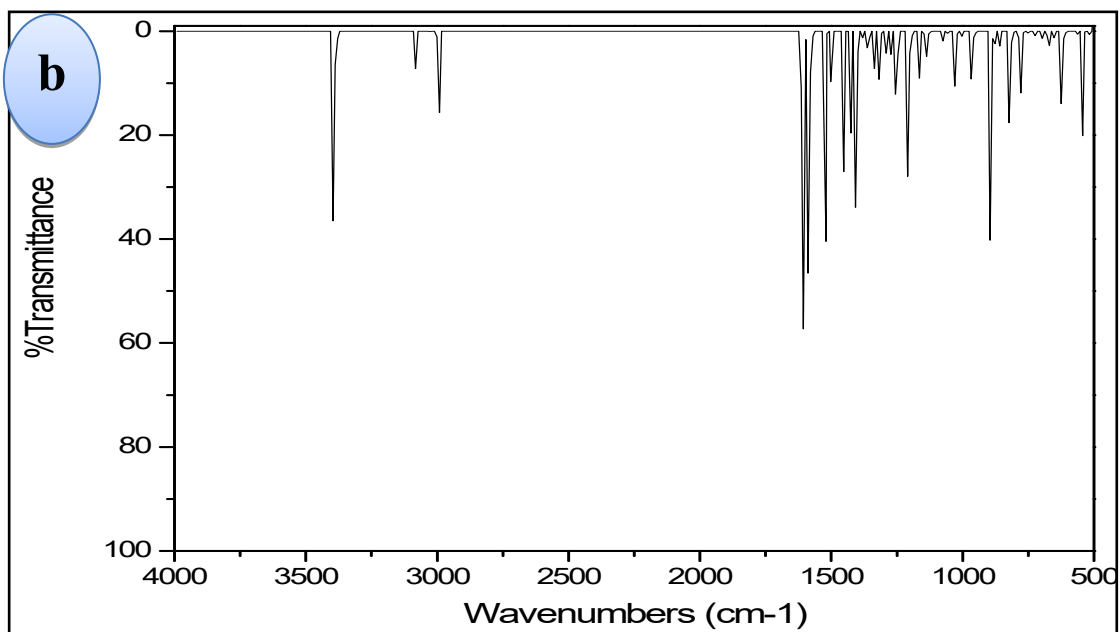

Fig. S16. (a) Experimental and (b) Calculated IR spectra of compound **5** at B3LYP/6-311++G(d,p).

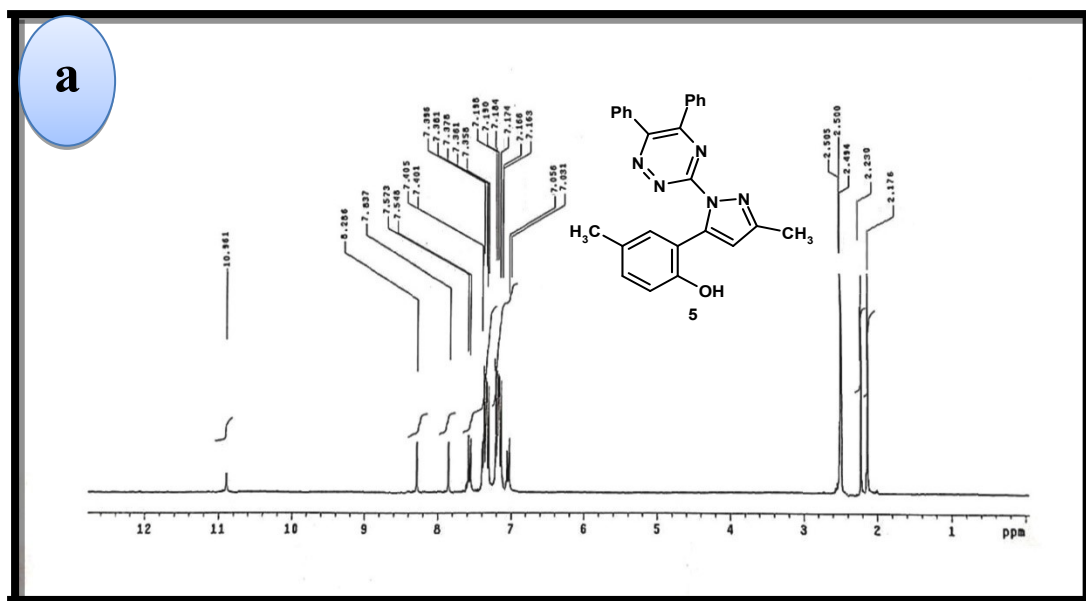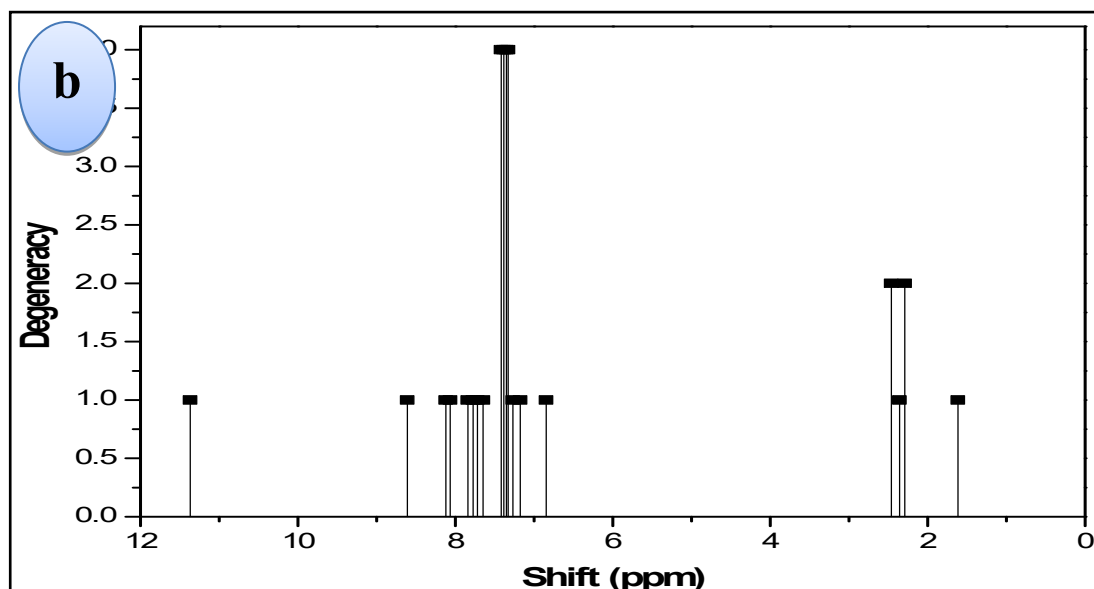

Fig. S17. (a) Experimental and (b) Calculated <sup>1</sup>H NMR spectra of compound **5** at B3LYP/6-311++G(d,p).

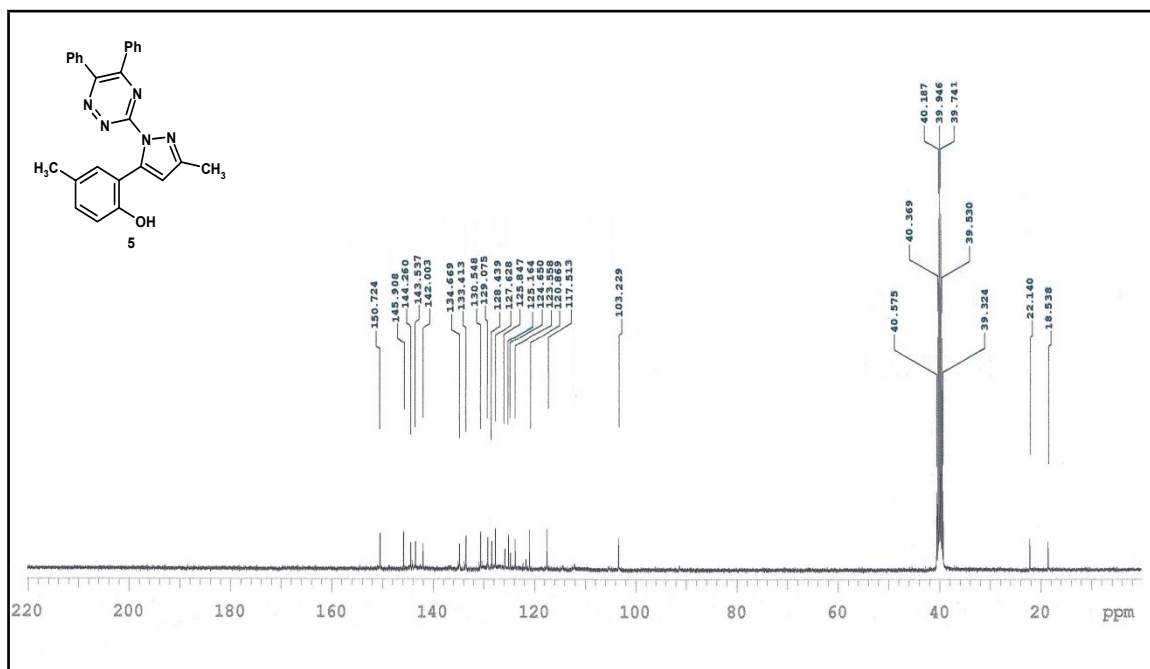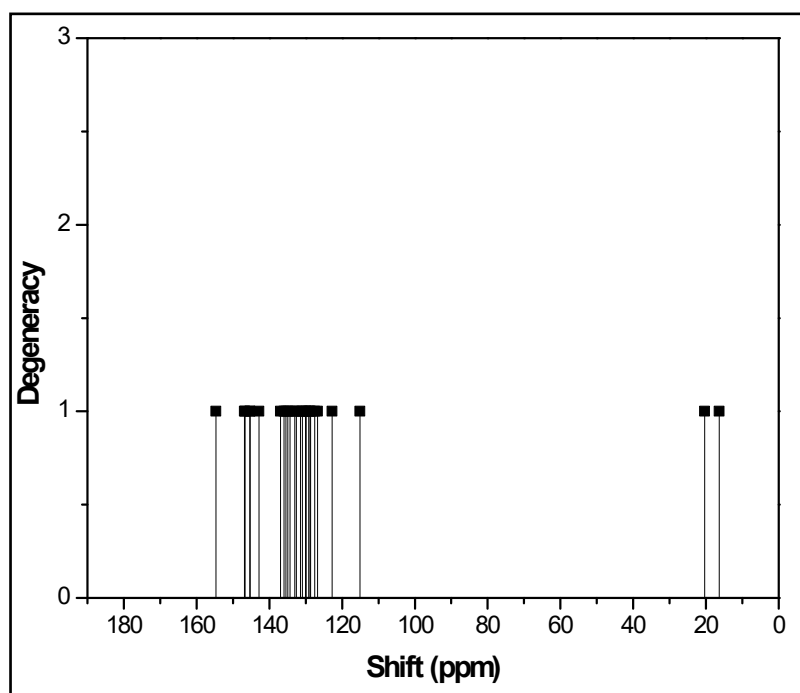

Fig. S18. (a) Experimental and (b) Calculated  $^{13}\text{C}$  NMR spectra of compound **5** at B3LYP/6-311++G(d,p).

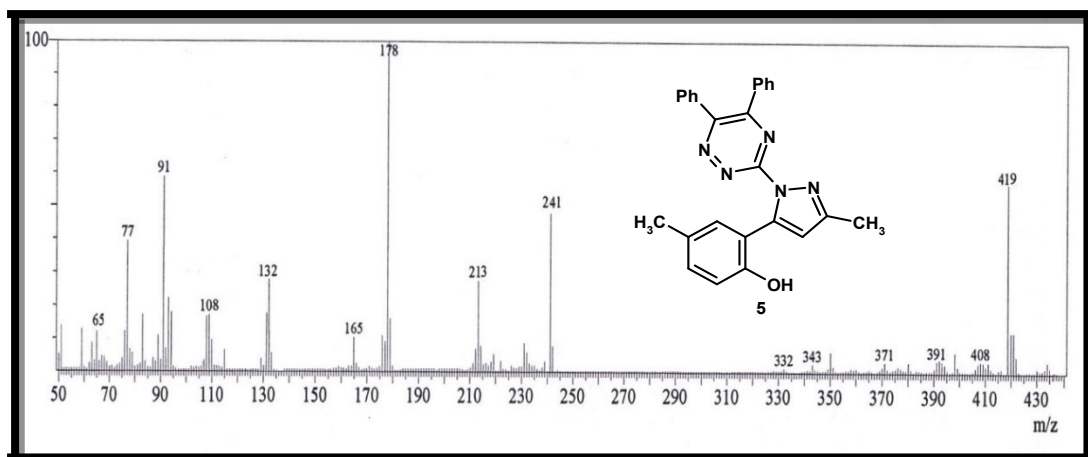

Fig. S19. Mass spectrum of compound **5**

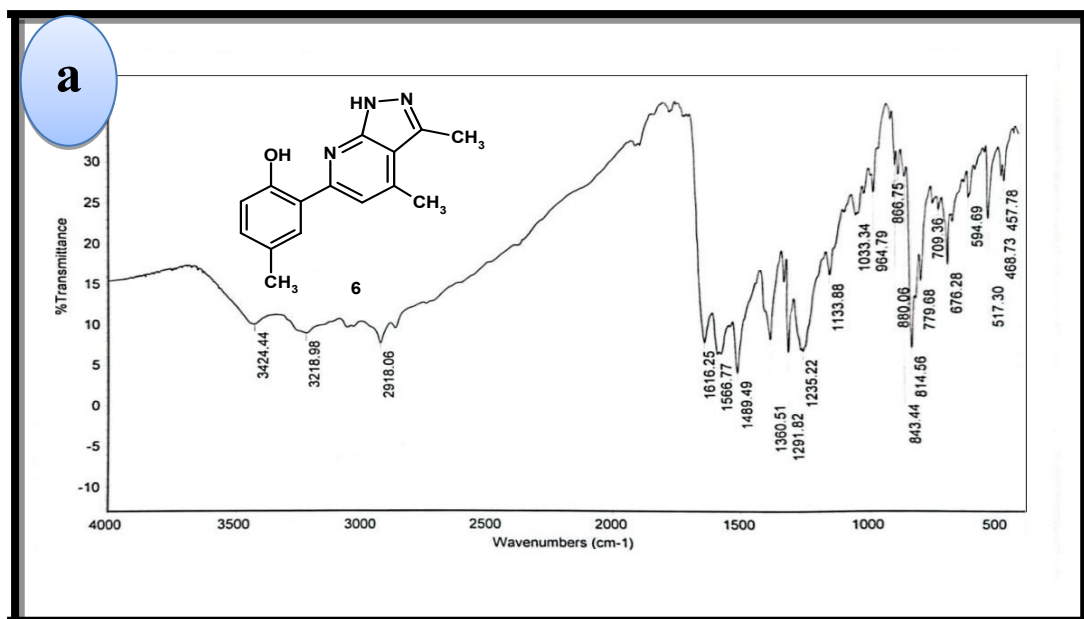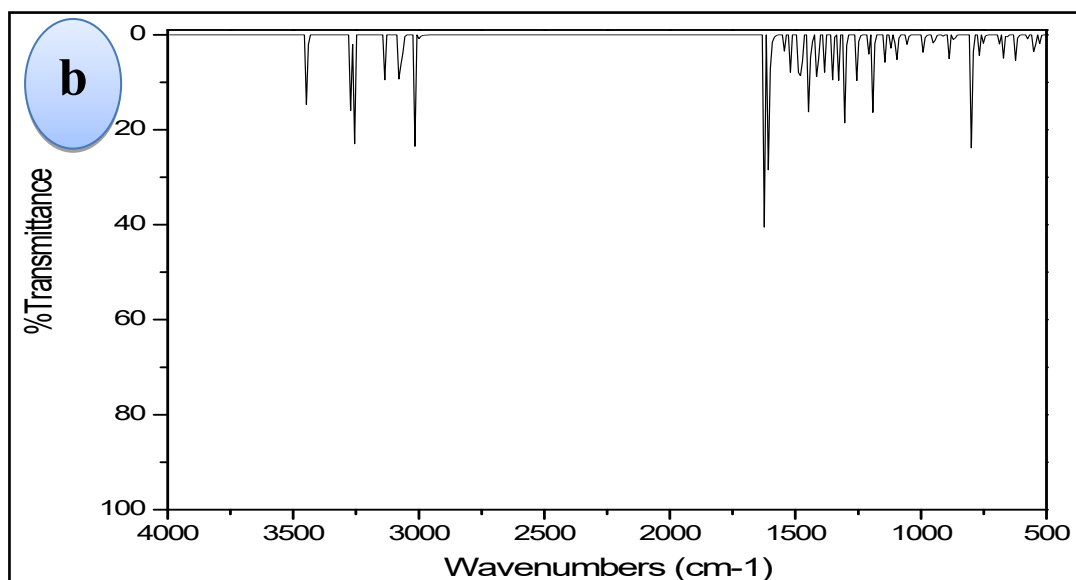

Fig. S20. (a) Experimental and (b) Calculated IR spectra of compound **6** at B3LYP/6-311++G(d,p).

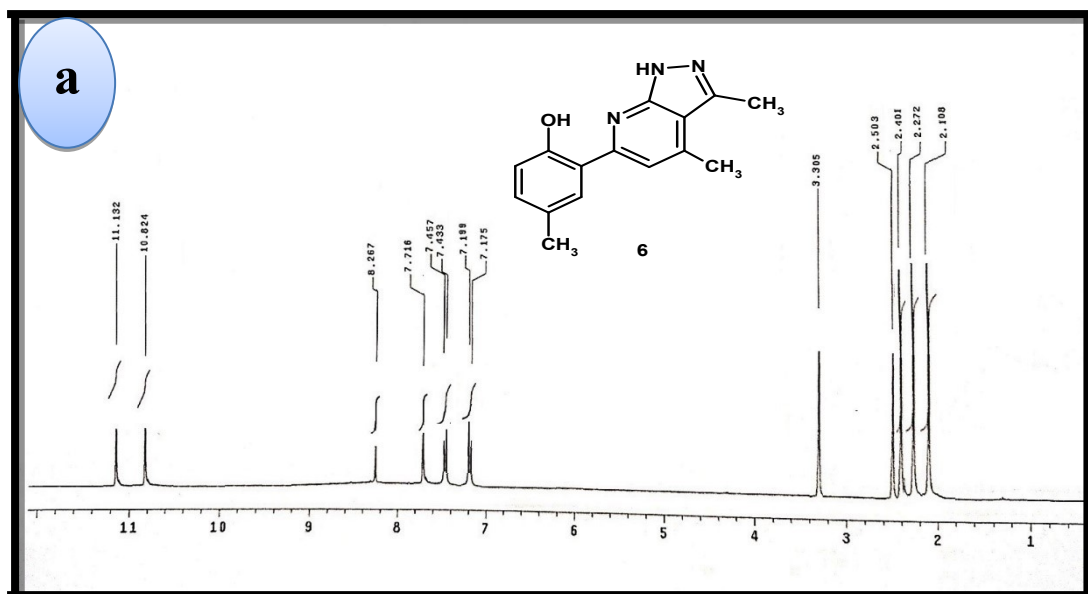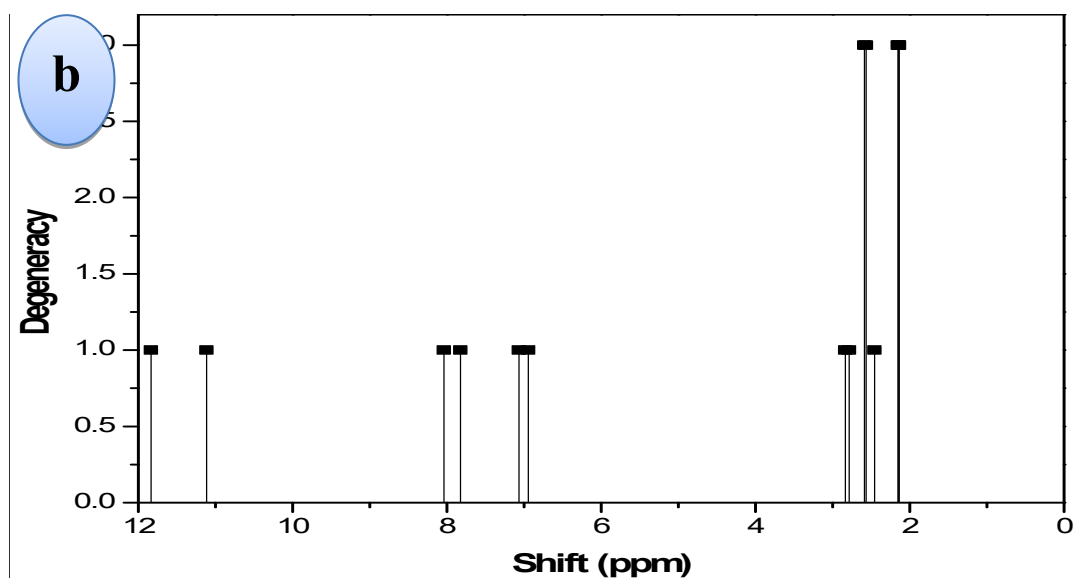

Fig. S21. (a) Experimental and (b) Calculated  $^1\text{H}$  NMR spectra of compound **6** at B3LYP/6-311++G(d,p).

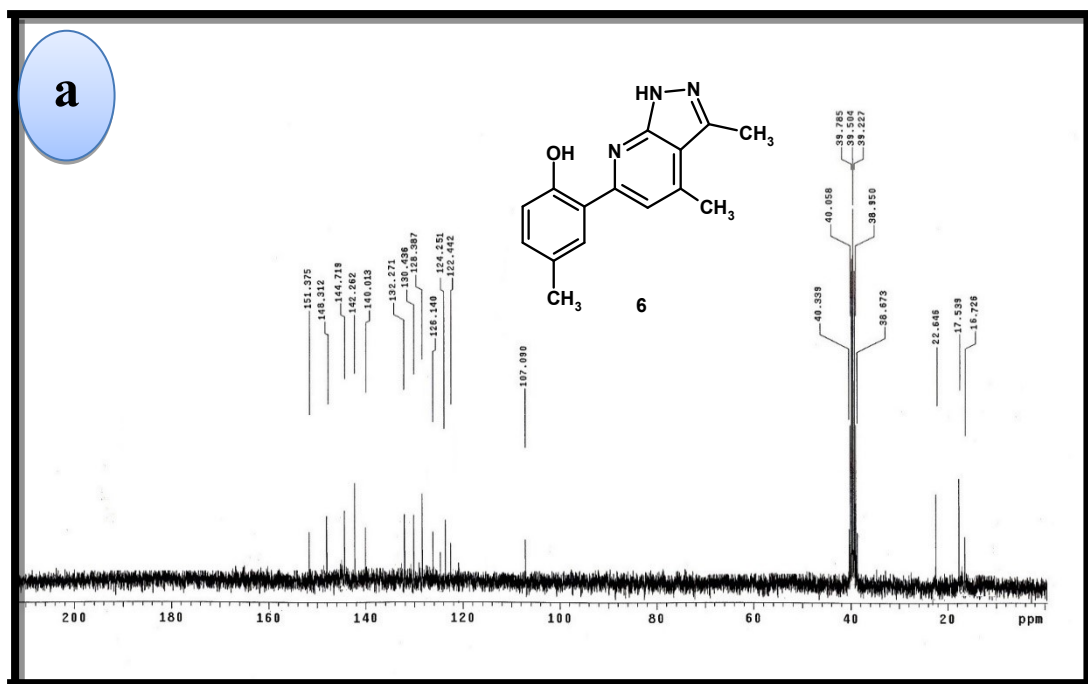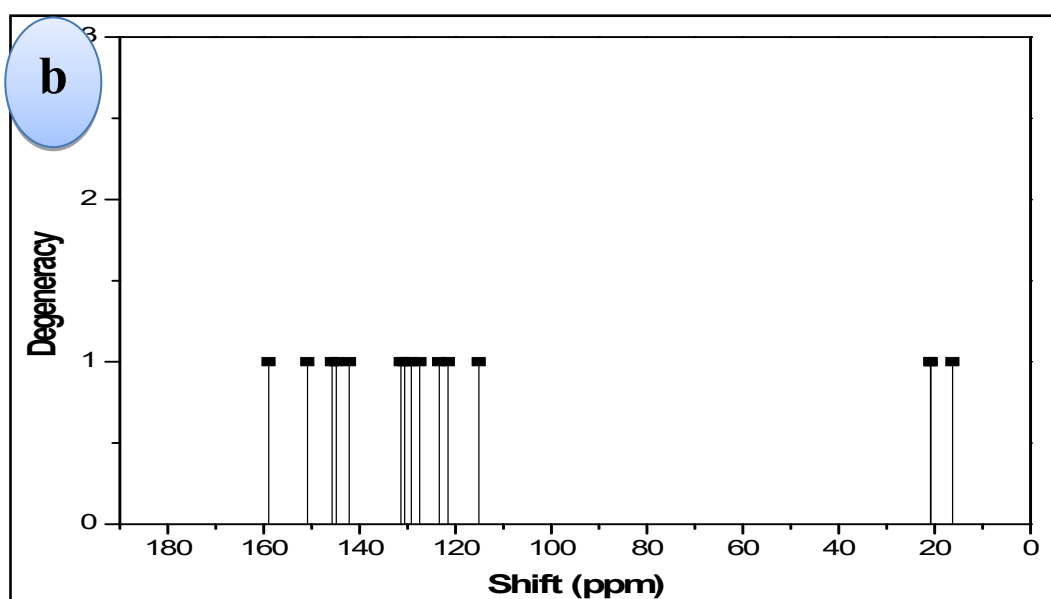

Fig. S22. (a) Experimental and (b) Calculated  $^{13}\text{C}$  NMR spectra of compound **6** at B3LYP/6-311++G(d,p).

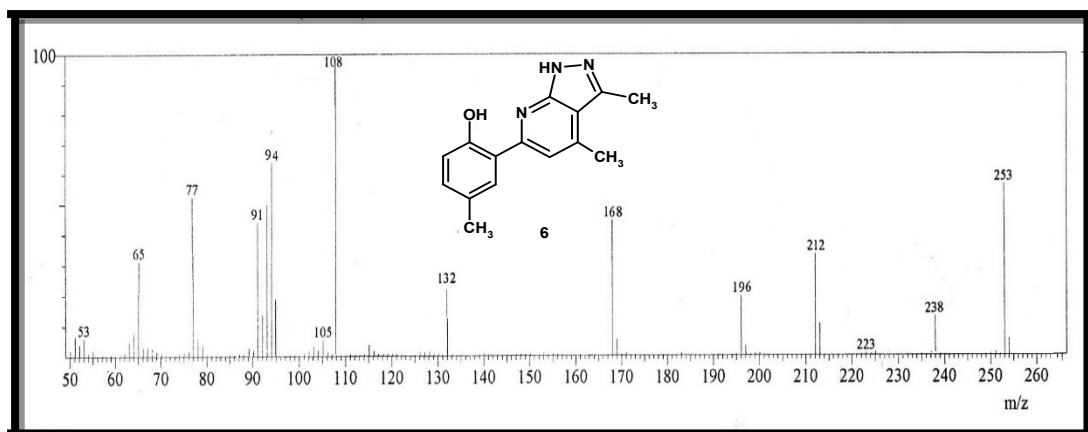

Fig. S23. Mass spectrum of compound 6

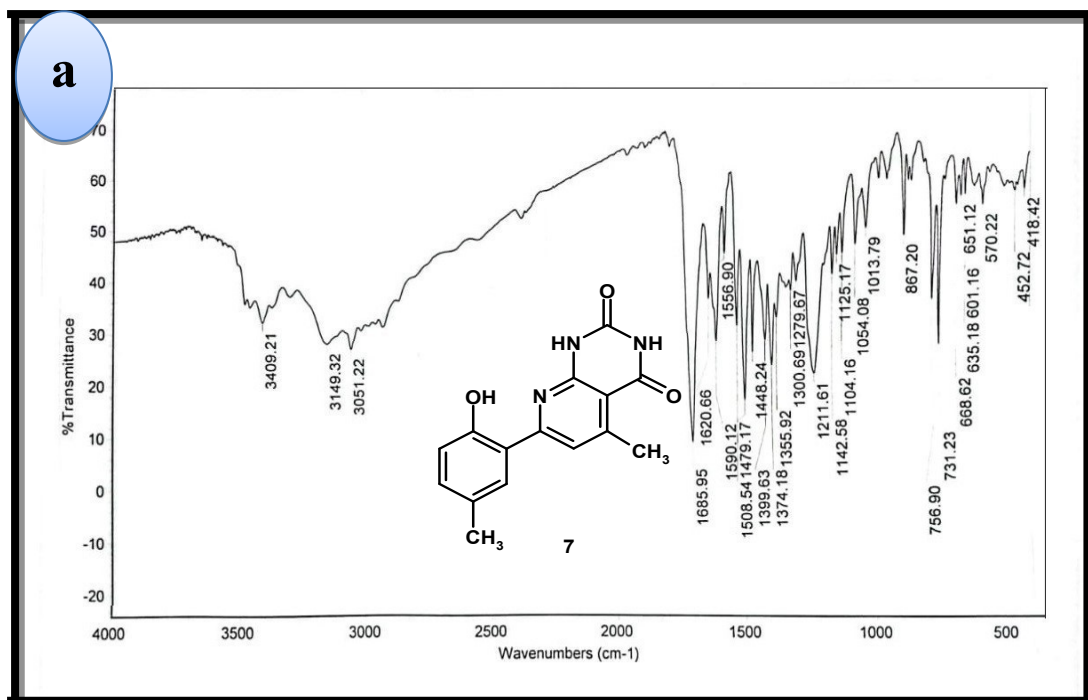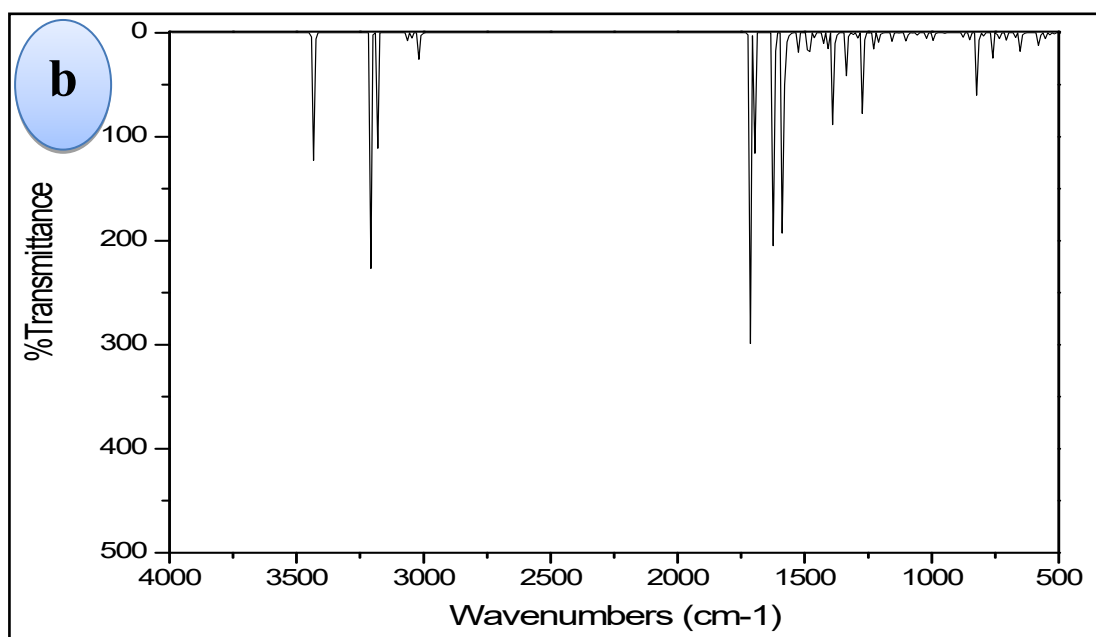

Fig. S24. (a) Experimental and (b) Calculated IR spectra of compound 7 at B3LYP/6-311++G(d,p).

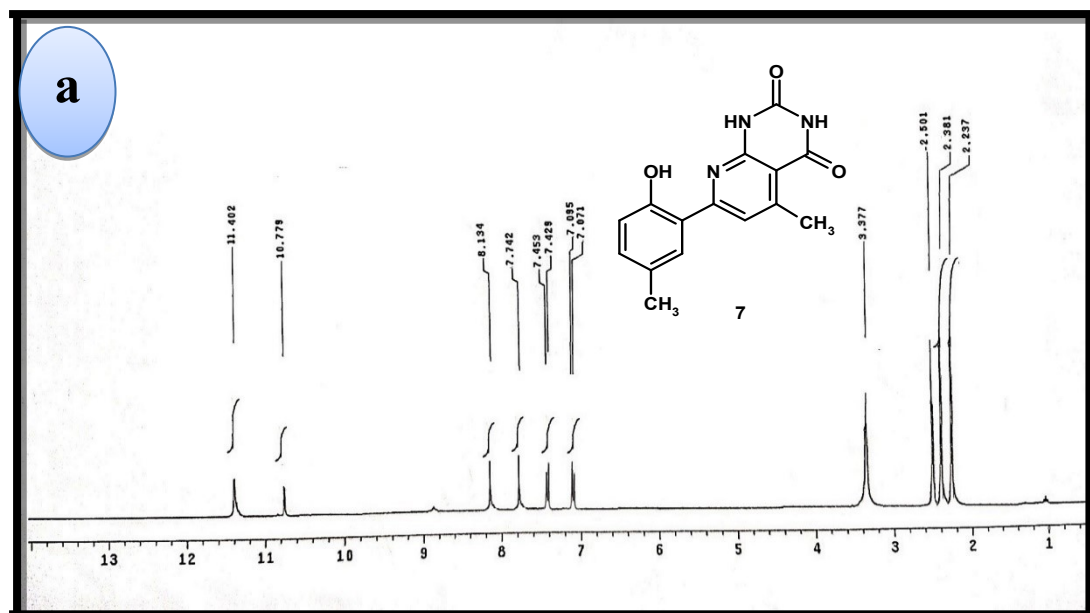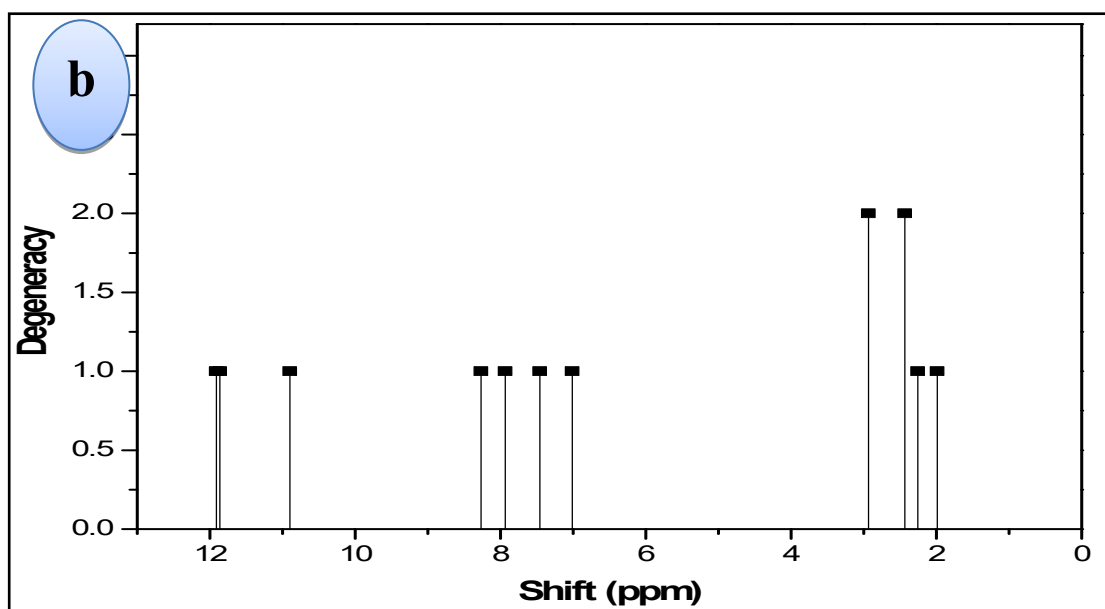

Fig. S25. (a) Experimental and (b) Calculated  $^1\text{H}$  NMR spectra of compound **7** at B3LYP/6-311++G(d,p).

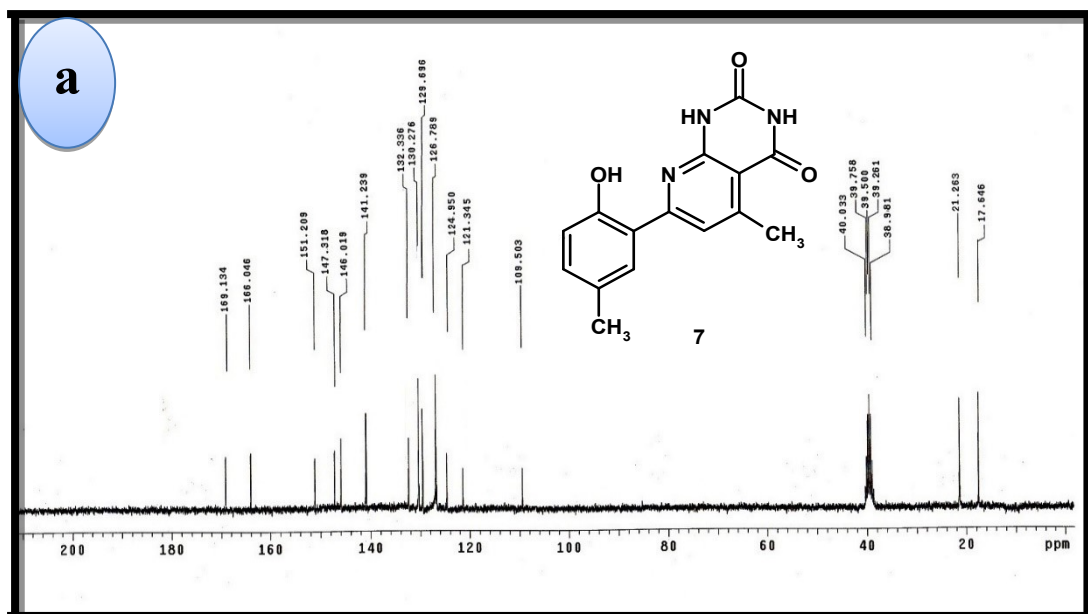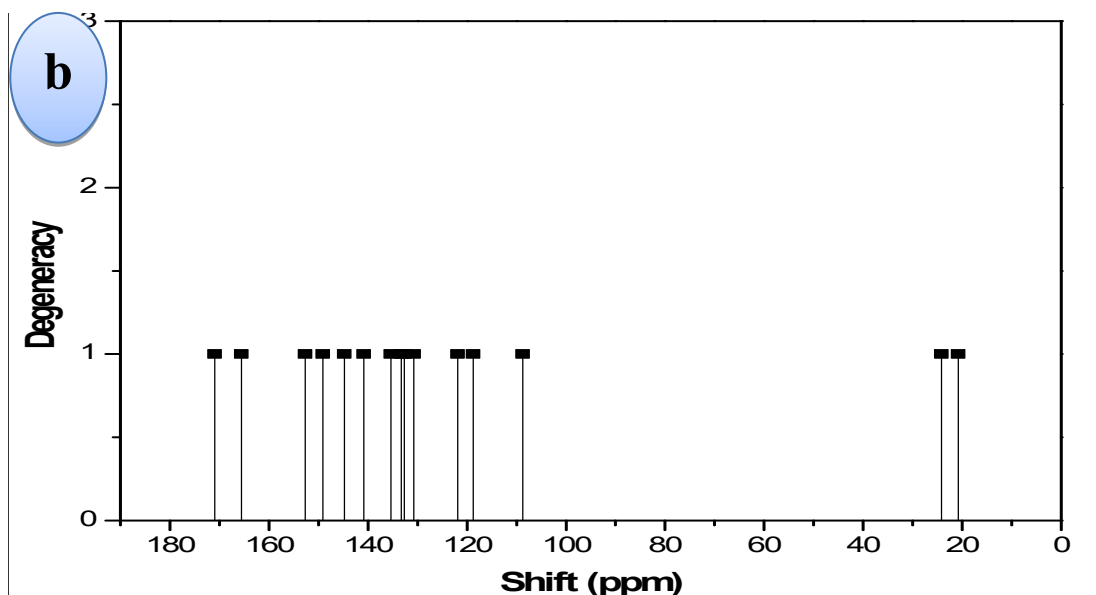

Fig. S26. Experimental and Calculated  $^{13}\text{C}$  NMR spectra of compound 7 at B3LYP/6-311++G(d,p).

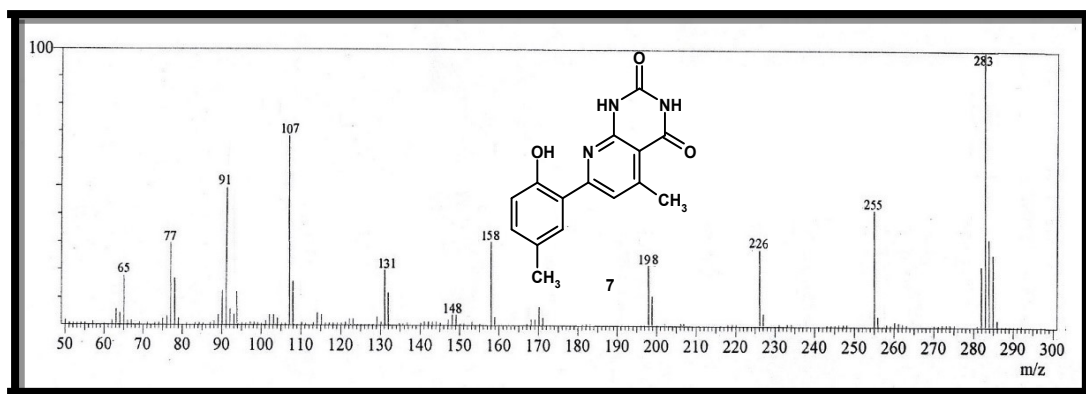

Fig. S27. Mass spectrum of compound 7

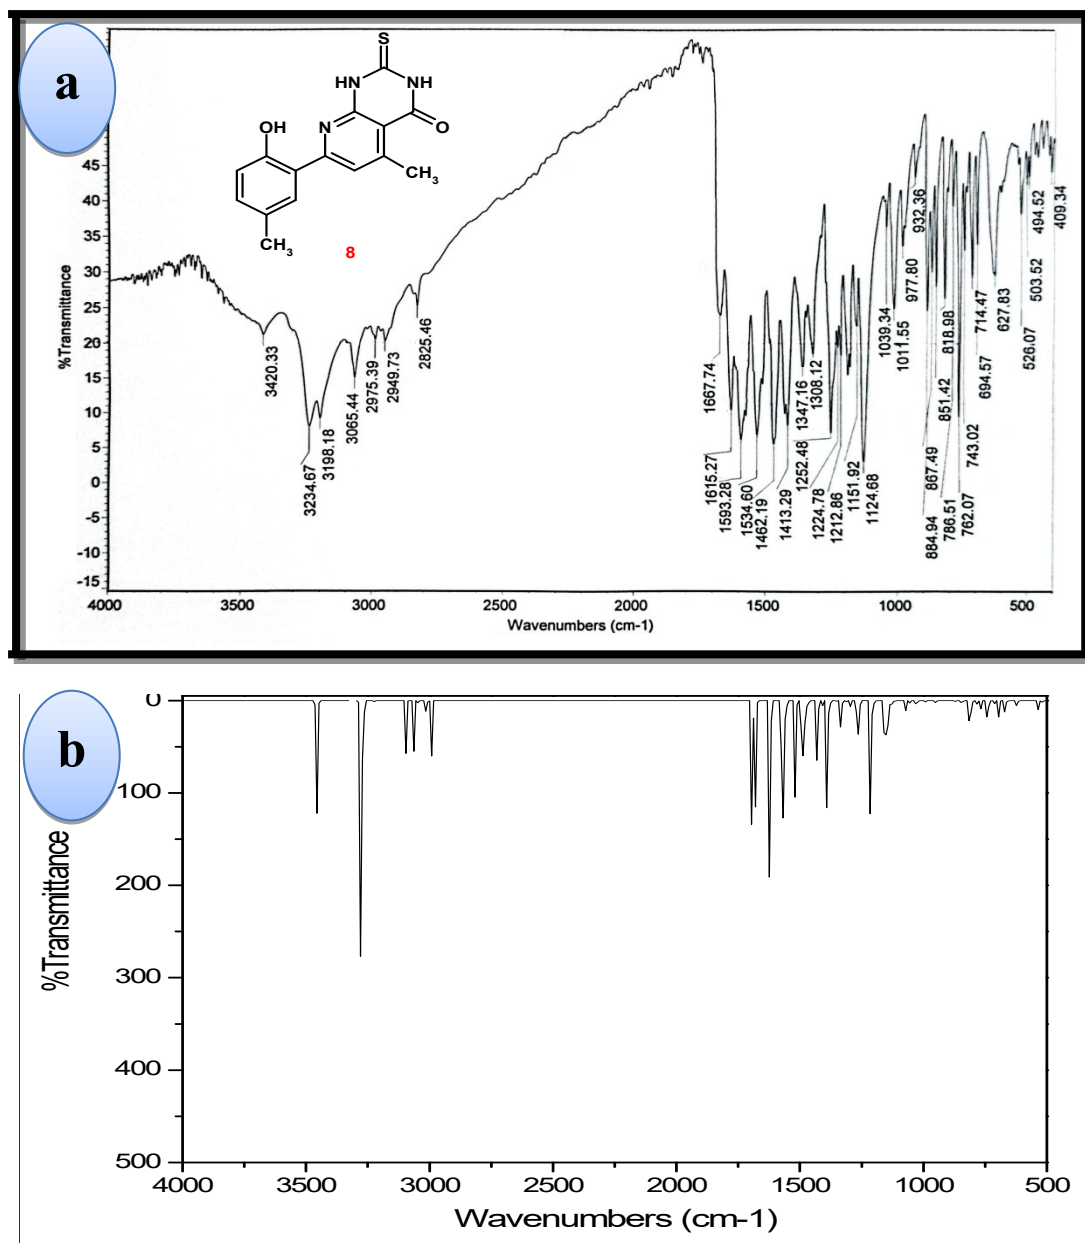

Fig. S28. (a) Experimental and (b) Calculated IR spectra of compound **8** at B3LYP/6-311++G(d,p).

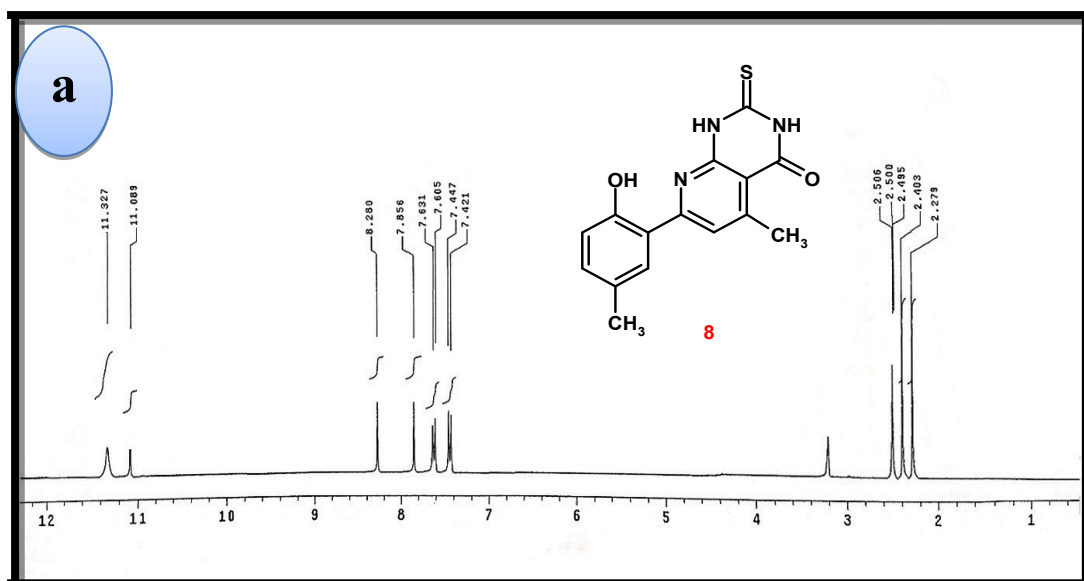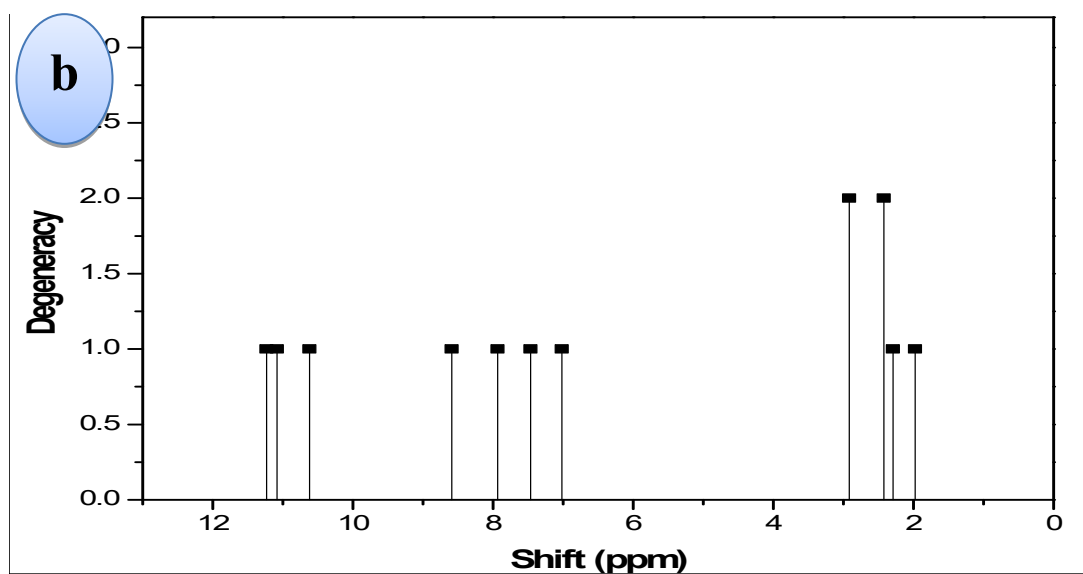

Fig. S29. (a) Experimental and (b) Calculated  $^1\text{H}$  NMR spectra of compound **8** at B3LYP/6-311++G(d,p).

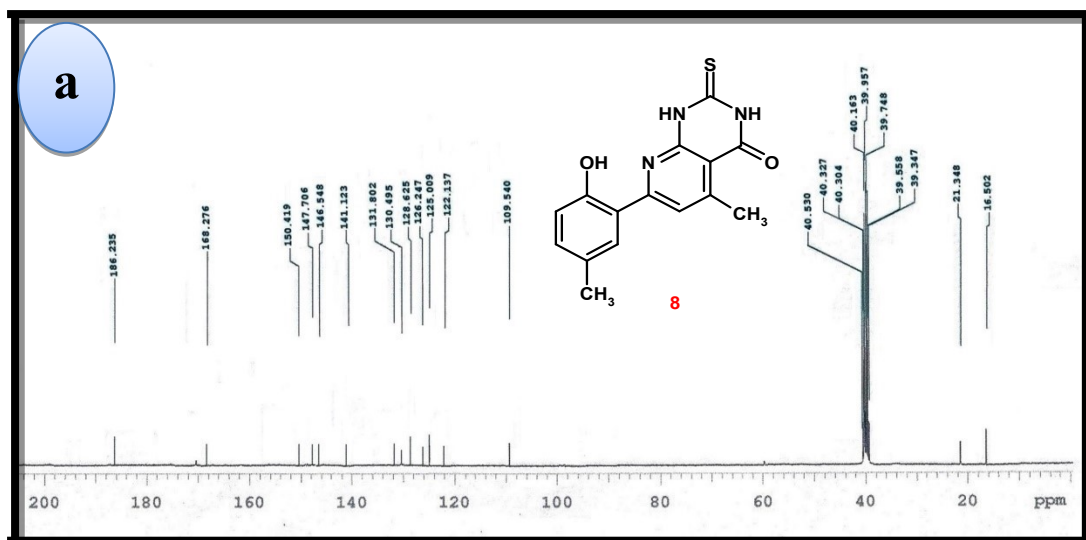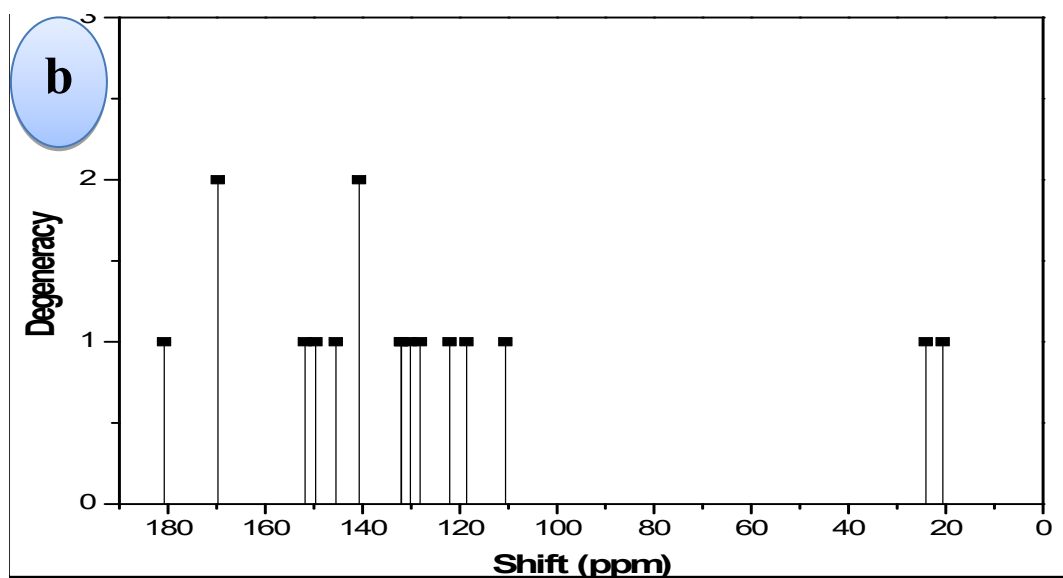

Fig. S30. Experimental and Calculated  $^{13}\text{C}$  NMR spectra of compound **8** at B3LYP/6-311++G(d,p).

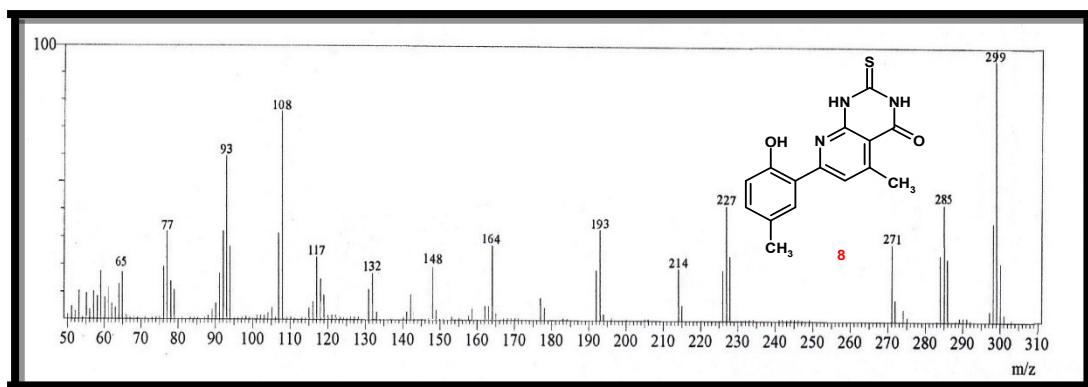

Fig. S31. Mass spectrum of compound **8**

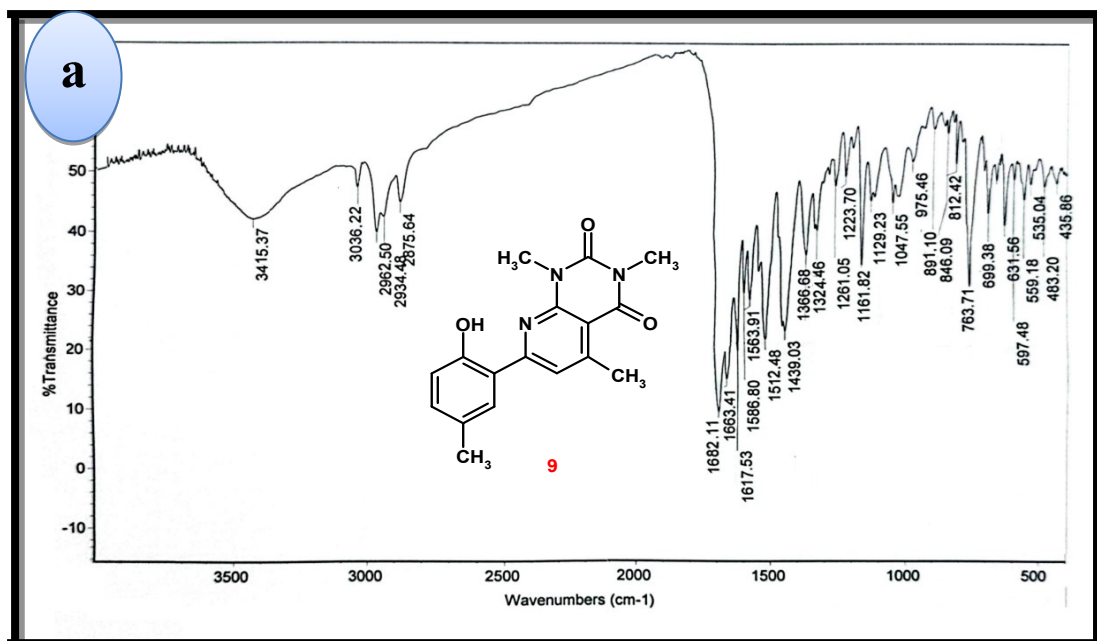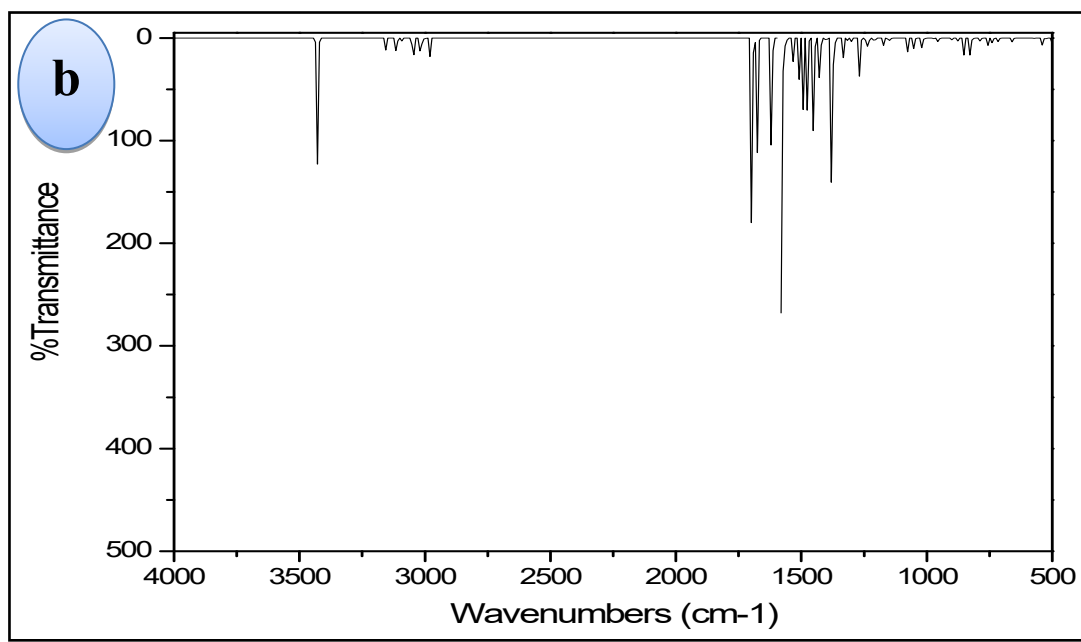

Fig. S32. (a) Experimental and (b) Calculated IR spectra of compound **9** at B3LYP/6-311++G(d,p).

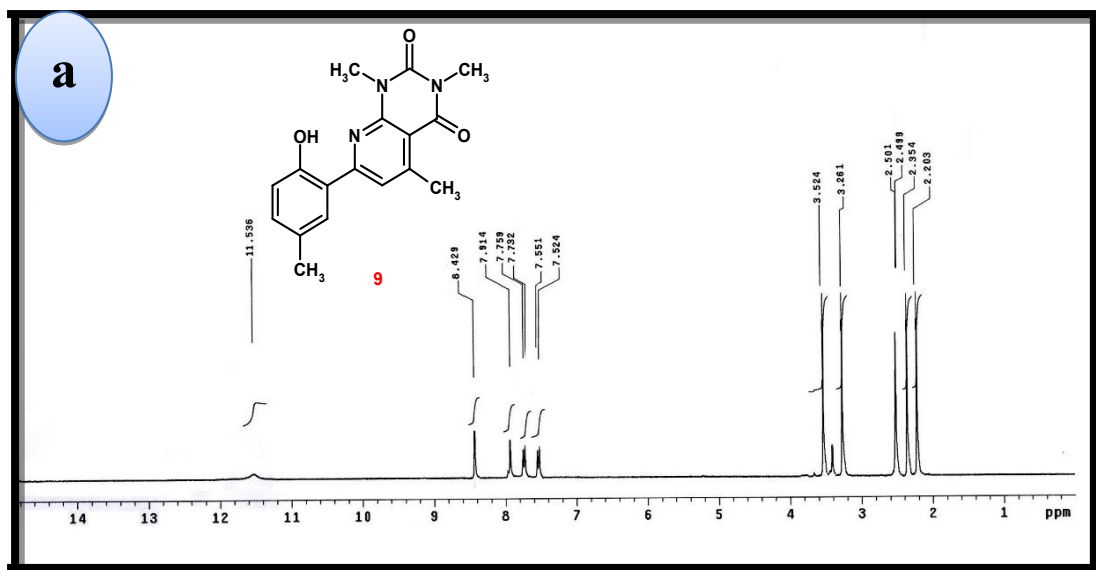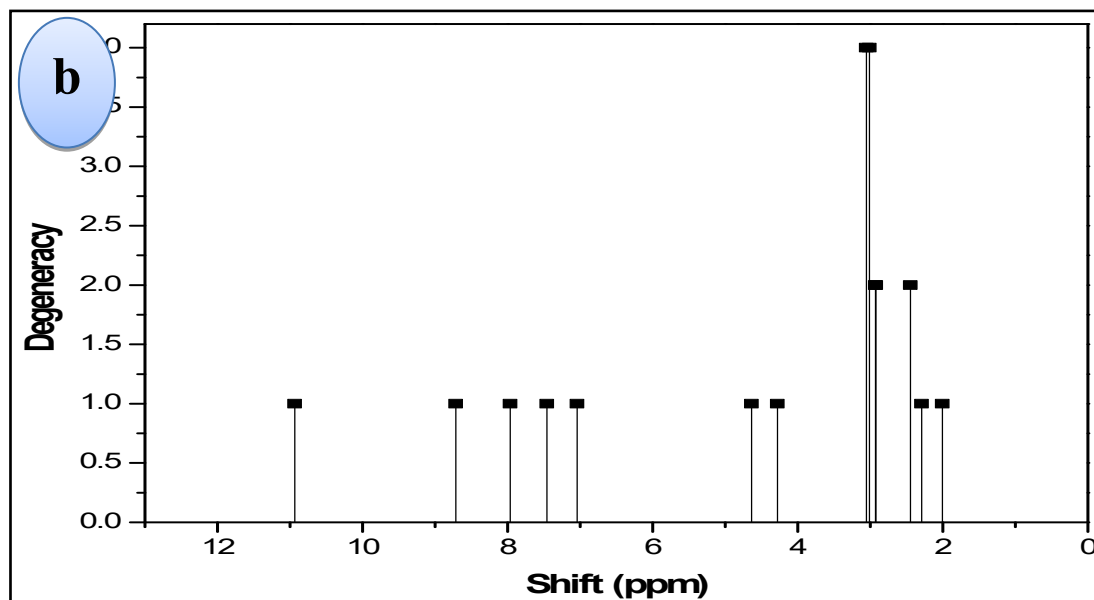

Fig. S33. (a) Experimental and (b) Calculated  $^1\text{H}$  NMR spectra of compound **9** at B3LYP/6-311++G(d,p).

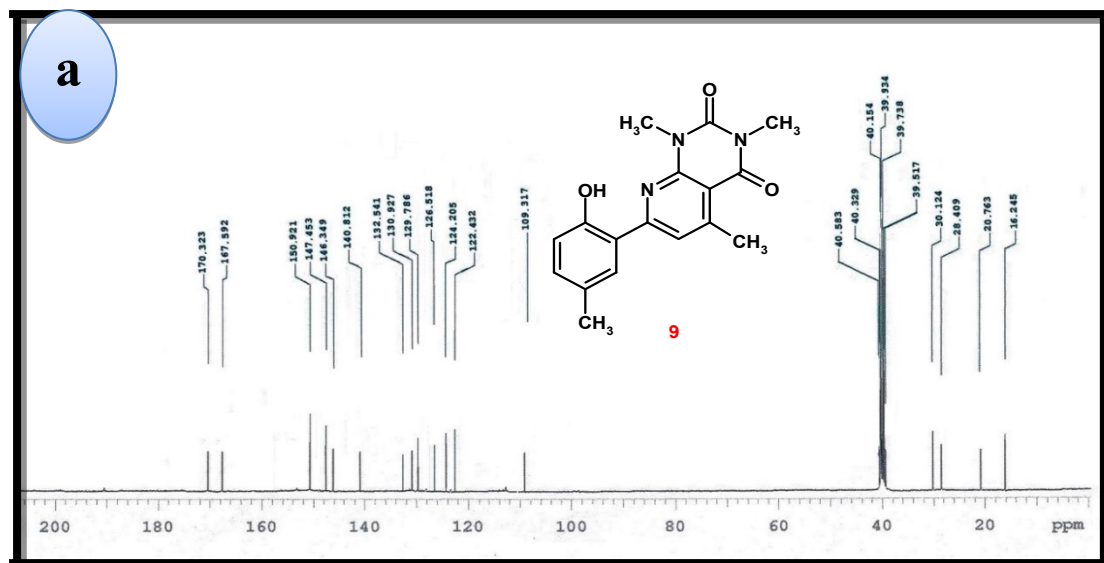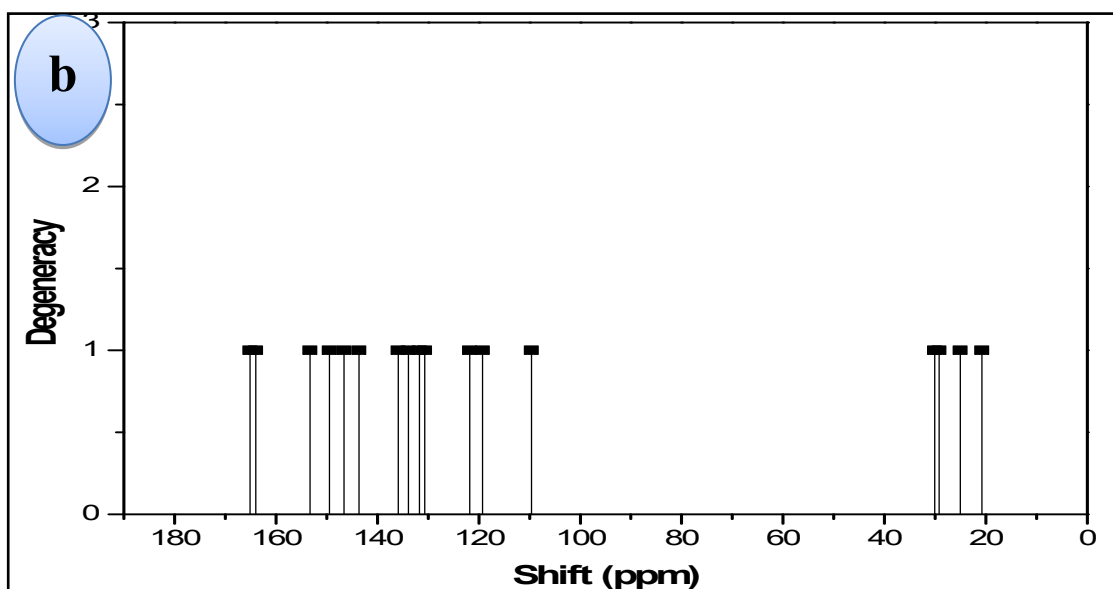

Fig. S34. Experimental and Calculated  $^{13}\text{C}$  NMR spectra of compound 7 at B3LYP/6-311++G(d,p).

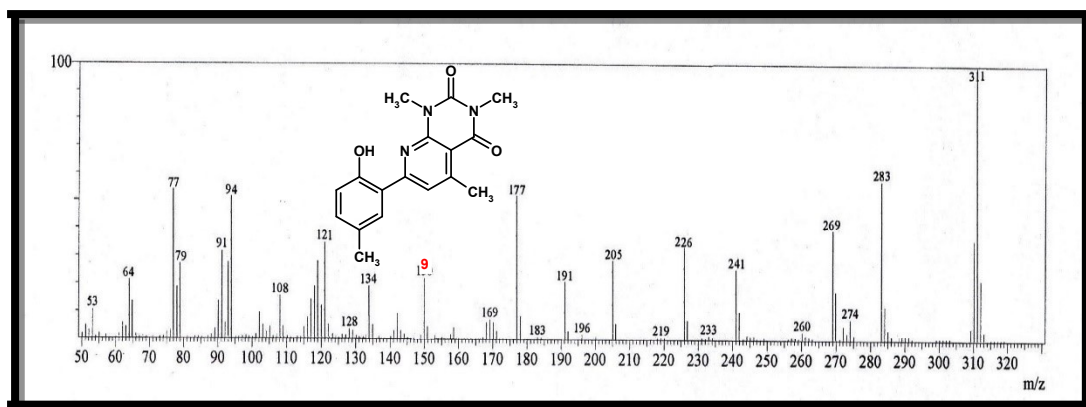

Fig. S35. Mass spectrum of compound **9**

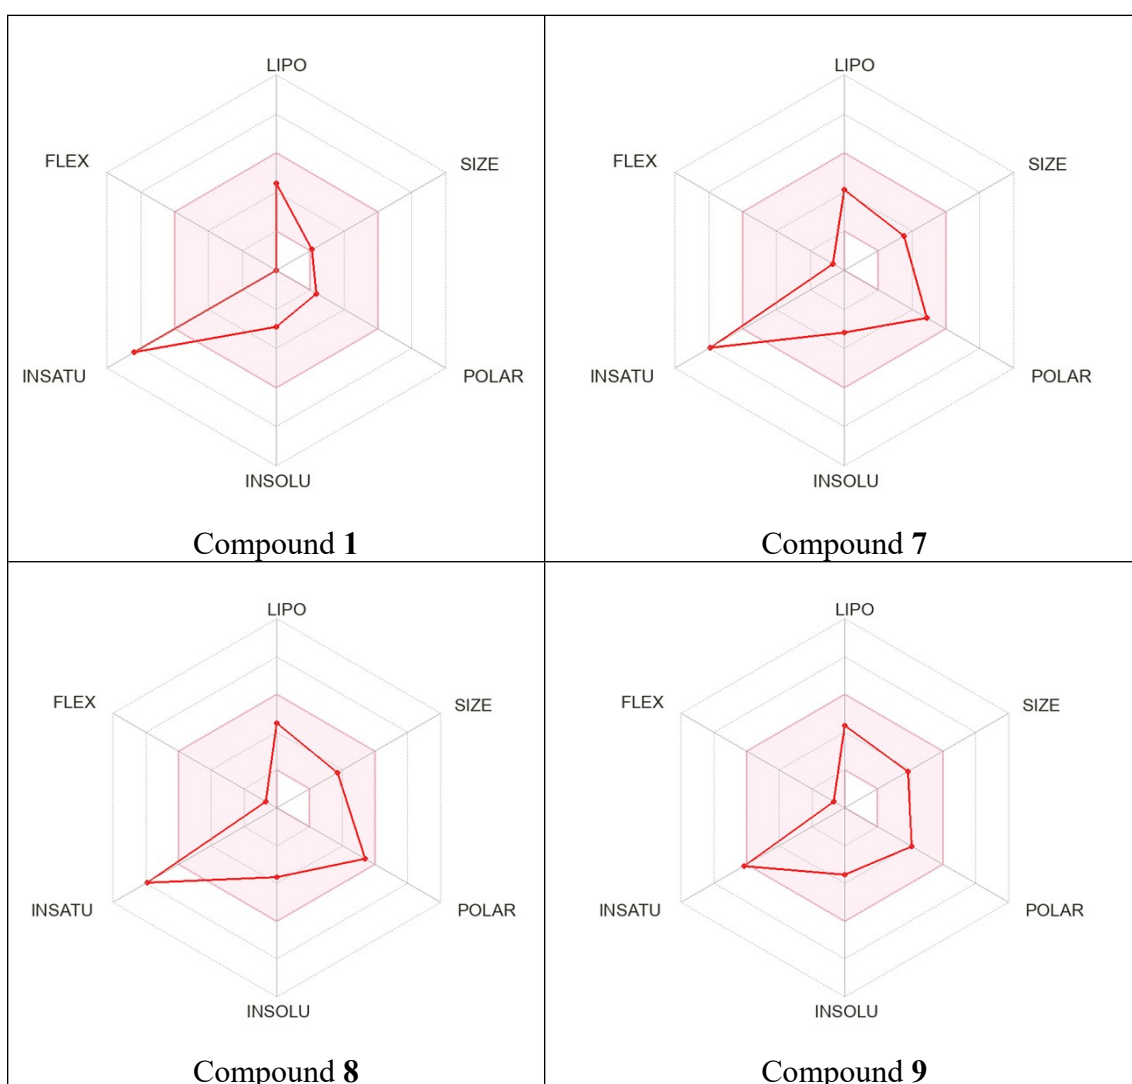

Fig. S36. The bioavailability radars of compounds **1** and **7-9**

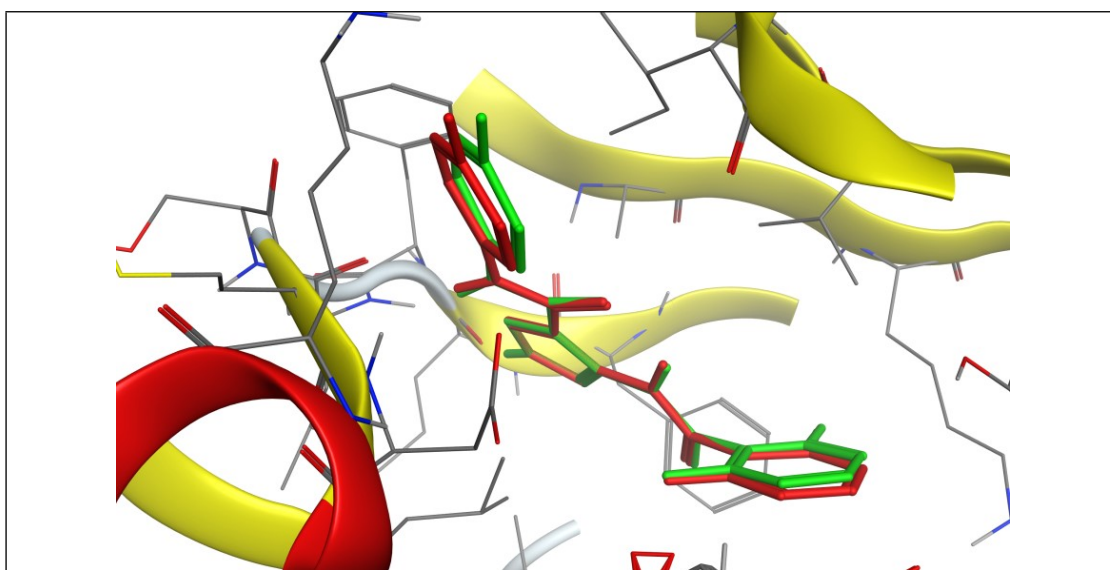

Fig. S37. 3D representation of the superimposition of the co-crystallized (red) and the redocking pose (green) of the NC(=O)c1cc(F)c(F)c1-c1cc(F)c(F)c1 ligand in target protein (pdb ID: 4Y72).

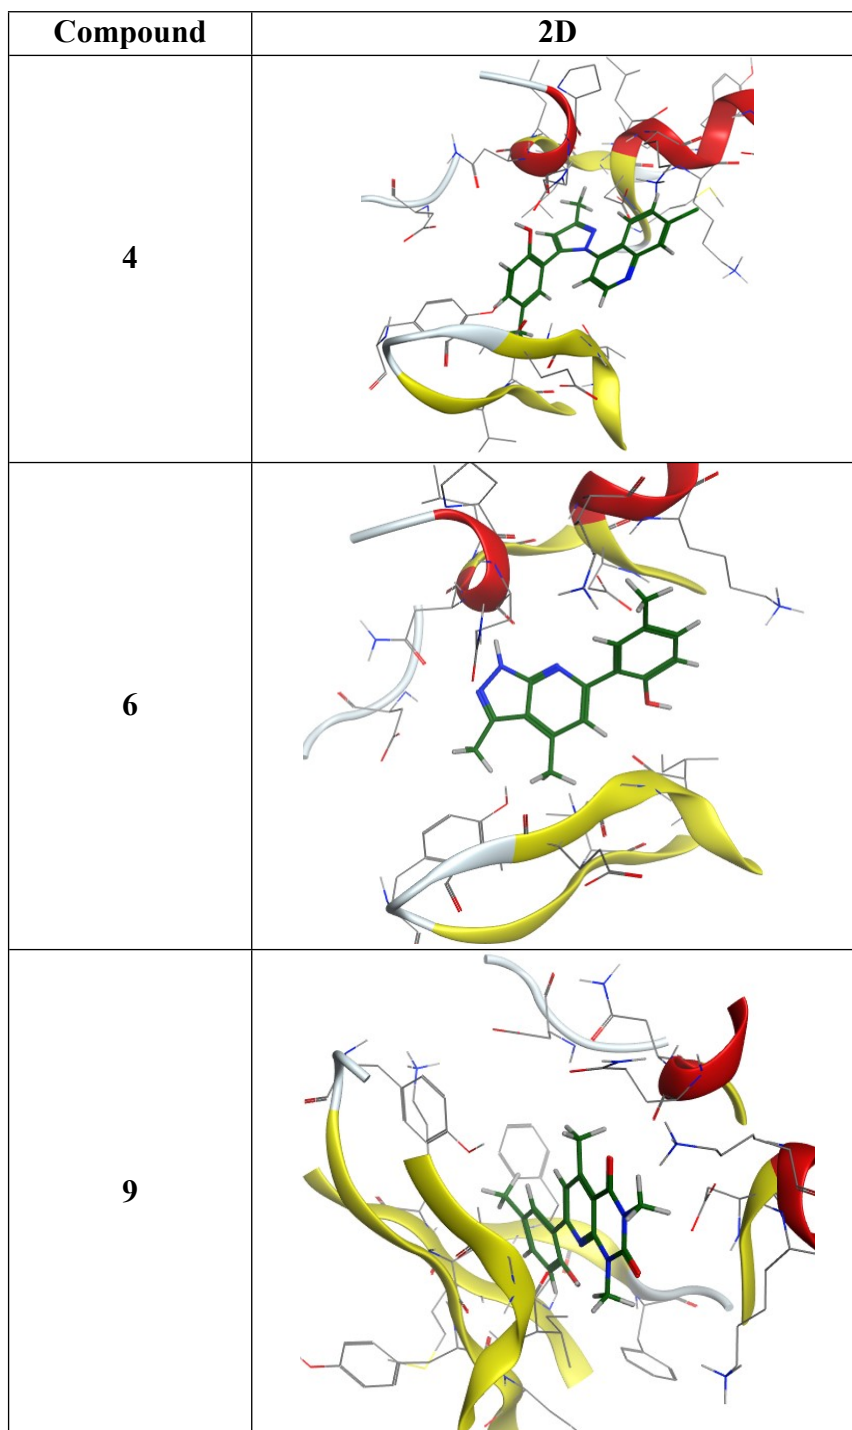

Fig. S38. 2D representation of the hydrogen bonding between the studied compounds (4, 6, 9) with the amino acids residues of the target protein (PDB ID: 4Y72).

**Table S1.** Various interactions between the studied compounds **4**, **6** and **9** with the amino acids residues of the target protein (pdb ID: 4Y72).

| <b>Compound 4</b><br>(Binding energy -8.10 kcal/mol) |          |                     | <b>Compound 6</b><br>(Binding energy -7.80 kcal/mol) |          |                  |
|------------------------------------------------------|----------|---------------------|------------------------------------------------------|----------|------------------|
| Receptor                                             | Distance | Interaction Type    | Receptor                                             | Distance | Interaction Type |
| ALA31                                                | 2.90     | Pi-Sigma            | ASN133                                               | 2.65     | H-Bond           |
| LYS89                                                | 3.83     | Alkyl               | ASP86                                                | 2.59     | Pi-Anion         |
| ILE10                                                | 4.29     | Pi-Alkyl            | VAL18                                                | 4.85     | Alkyl            |
| ALA31                                                | 3.71     | Pi-Alkyl            | LYS88                                                | 3.70     | Alkyl            |
| LYS33                                                | 4.39     | Pi-Alkyl            | LYS89                                                | 4.47     | Alkyl            |
| LYS20                                                | 5.28     | Pi-Alkyl            | TYR15                                                | 5.02     | Pi-Alkyl         |
|                                                      |          |                     | LYS89                                                | 4.73     | Pi-Alkyl         |
| <b>Compound 9</b><br>(Binding energy -8.40 kcal/mol) |          |                     |                                                      |          |                  |
| ILE10                                                | 2.18     | H-Bond              |                                                      |          |                  |
| ILE10                                                | 2.14     | H-Bond              |                                                      |          |                  |
| ASP86                                                | 2.86     | H-Bond              |                                                      |          |                  |
| ASP86                                                | 2.78     | H-Bond              |                                                      |          |                  |
| ASP86                                                | 3.31     | Pi-Anion            |                                                      |          |                  |
| VAL18                                                | 4.63     | Amide-Pi<br>Stacked |                                                      |          |                  |
| ALA31                                                | 4.43     | Alkyl               |                                                      |          |                  |
| LYS88                                                | 4.82     | Alkyl               |                                                      |          |                  |
| VAL18                                                | 2.91     | Alkyl               |                                                      |          |                  |
| LYS33                                                | 3.78     | Alkyl               |                                                      |          |                  |
| PHE80                                                | 4.96     | Pi-Alkyl            |                                                      |          |                  |
| ILE10                                                | 5.38     | Pi-Alkyl            |                                                      |          |                  |
| VAL18                                                | 4.95     | Pi-Alkyl            |                                                      |          |                  |
| ALA31                                                | 3.83     | Pi-Alkyl            |                                                      |          |                  |
